1 **Title: Pathogen effector recognition-dependent association of NRG1 with EDS1 and**  
2 **SAG101 in TNL receptor immunity**

3 Xinhua Sun<sup>1||</sup>, Dmitry Lapin<sup>1,5||</sup>, Joanna M. Feehan<sup>2||</sup>, Sara C. Stolze<sup>3</sup>, Katharina Kramer<sup>3</sup>,  
4 Joram A. Dongus<sup>1</sup>, Jakub Rzemieniewski<sup>1,6</sup>, Servane Blanvillain-Baufumé<sup>1</sup>, Anne Harzen<sup>3</sup>,  
5 Jaqueline Bautor<sup>1</sup>, Paul Derbyshire<sup>2</sup>, Frank L. H. Menke<sup>2</sup>, Iris Finkemeier<sup>3,6</sup>, Hirofumi  
6 Nakagami<sup>1,3</sup>, Jonathan D.G. Jones<sup>2\*</sup>, Jane E. Parker<sup>1,4\*</sup>

7 1 – Department of Plant-Microbe Interactions, Max Planck Institute for Plant Breeding  
8 Research, Carl-von-Linne-Weg 10, 50829 Cologne, Germany

9 2 – The Sainsbury Laboratory, University of East Anglia, Norwich, United Kingdom

10 3 – Proteomics group, Max Planck Institute for Plant Breeding Research, Carl-von-Linne-  
11 Weg 10, 50829 Cologne, Germany

12 4 - Cologne-Düsseldorf Cluster of Excellence on Plant Sciences (CEPLAS), 40225  
13 Düsseldorf, Germany

14 5 – Present address: Plant–Microbe Interactions, Department of Biology, Utrecht University,  
15 3584 CH Utrecht, The Netherlands

16 6 – Present address: Department of Phytopathology, TUM School of Life Sciences  
17 Weihenstephan, Technical University of Munich, Freising 85354, Germany

18 7 – Present address: Institute of Biology and Biotechnology of Plants, University of  
19 Muenster, Schlossplatz 7, 48149 Muenster, Germany

20 || These authors contributed equally

21 \* Corresponding authors

22

23 **Abstract**

24 Plants utilise intracellular nucleotide-binding, leucine-rich repeat (NLR) immune receptors to  
25 detect pathogen effectors and activate local and systemic defence. NRG1 and ADR1 "helper"  
26 NLRs (RNLs), cooperate with enhanced disease susceptibility 1 (EDS1), senescence-  
27 associated gene 101 (SAG101) and phytoalexin-deficient 4 (PAD4) lipase-like proteins to  
28 mediate signalling from TIR domain NLR receptors (TNLs). However, the mechanism of RNL/  
29 EDS1-family protein cooperation is poorly understood. Here, we provide genetic and  
30 molecular evidence for exclusive EDS1/SAG101/NRG1 and EDS1/PAD4/ADR1 co-functions  
31 in TNL immunity. Using immunoprecipitation and mass spectrometry, we show effector  
32 recognition-dependent association of NRG1 with EDS1 and SAG101, but not PAD4. An  
33 EDS1-SAG101 complex associates with NRG1, and EDS1-PAD4 associates with ADR1, only  
34 in an immune-activated state. NRG1 requires an intact nucleotide-binding P-loop motif, and  
35 EDS1 a functional EP domain and its partner SAG101, for induced association and immunity.  
36 Thus, two distinct modules (NRG1/EDS1/SAG101 and ADR1/EDS1/PAD4) are required to  
37 execute TNL receptor defence signalling.

38

## 39 Introduction

40 Plants and animals have evolved structurally and functionally related cell surface and  
41 intracellular receptors that detect pathogen-derived molecules and activate innate immune  
42 responses. In both kingdoms, pathogen recognition by intracellular nucleotide-  
43 binding/leucine-rich repeat (NLR) receptors restricts disease <sup>1</sup>. Whereas mammals tend to  
44 have few functional NLR receptors, many plants have expanded and diversified NLR gene  
45 repertoires, likely in response to evolutionary pressure from host-adapted pathogens and  
46 pests <sup>1,2</sup>. Despite these different trajectories, plant and mammalian NLRs behave similarly as  
47 conformational switches for triggering defence and immune-related death pathways <sup>3</sup>. Plant  
48 NLRs directly bind pathogen strain-specific virulence factors (called effectors) or sense their  
49 modification of host immunity targets <sup>4</sup>. NLR-effector recognition leads to a process called  
50 effector-triggered immunity (ETI) which stops pathogen infection and is often accompanied by  
51 localized host cell death <sup>5</sup>.

52

53 Increasing evidence in mammals and plants suggests NLR activation results from induced  
54 NLR oligomerization to form signalling-active scaffolds <sup>6</sup>. Plant NLR receptors are classified  
55 on the basis of their N-terminal signalling domain architectures: Toll/interleukin-1  
56 receptor/resistance (TIR) NLRs (or TNLs) and coiled-coil (CC) NLRs (CNLs). The cryo-EM  
57 structure of a pathogen-activated CNL pentamer, *Arabidopsis* ZAR1, shows that five N-  
58 terminal domain protomers assemble a putative membrane-associated pore or channel which  
59 might represent a CC-mediated mechanism for activating defence signalling <sup>7</sup>. By contrast,  
60 structures of two pathogen-activated TNL receptor tetramers, *Arabidopsis* RPP1 and tobacco  
61 (*Nicotiana benthamiana*) Roq1, reveal that the four N-terminal TIR domains become  
62 reorganized to create a holoenzyme <sup>8,9</sup>. Studies show that TIR-domains have NAD<sup>+</sup> hydrolysis  
63 activity which, for plant TNLs, is necessary to initiate an authentic host immune response <sup>10</sup>.  
64 <sup>11</sup>. Hence, CNL- and TNL receptor early outputs appear to be different, though both are  
65 initiated by recognition-dependent oligomerization.

66

67 How NLR activation is transmitted to downstream pathways in ETI is more obscure, although  
68 CNLs and TNLs converge on qualitatively similar transcriptional programmes that drive local  
69 and systemic resistance <sup>12, 13, 14</sup>. NLRs also cooperate with cell surface pattern recognition  
70 receptor (PRR) systems mediating pattern-triggered immunity (PTI) to confer a fully effective  
71 immune response <sup>15, 16</sup>. Moreover, CNLs and TNLs rely on a network of signalling NLRs  
72 (generically referred to as helper NLRs) to promote immunity and host cell death <sup>17, 18, 19</sup>. Two  
73 related sub-families of helper NLRs, N requirement gene 1 (NRG1) <sup>20, 21</sup> and activated disease  
74 resistance 1 (ADR1) <sup>22</sup>, are characterized by an N-terminal four-helix bundle domain with

75 homology to *Arabidopsis* resistance to powdery mildew 8 (RPW8) and plant, fungal and  
76 mammalian mixed lineage kinase cell death executors (MLKLs) that have HET-S/LOP-B  
77 (HeLo) domains<sup>23, 24</sup>. These helper NLRs are called CC<sub>R</sub>-NLRs (or RNLs)<sup>17</sup>. In *Arabidopsis*,  
78 two functionally redundant *NRG1* paralogues (*NRG1.1* and *NRG1.2*) and three redundant  
79 *ADR1* paralogs (*ADR1*, *ADR1-L1* and *ADR1-L2*) contribute genetically to different extents to  
80 resistance and host cell death mediated by CNL and TNL receptors against a range of  
81 pathogens<sup>12, 19, 25, 26</sup>. Functionally relevant interactions have not been found so far that would  
82 link RNLs molecularly to sensor NLRs or downstream signalling pathways.

83 The enhanced disease susceptibility 1 (EDS1) family of three lipase-like proteins, EDS1,  
84 senescence-associated gene 101 (SAG101) and phytoalexin deficient 4 (PAD4), constitutes  
85 a major NLR immunity signalling node<sup>27</sup>. *EDS1* is essential for TNL dependent ETI across  
86 flowering plant species<sup>26, 28, 29</sup> and forms mutually exclusive, functional heterodimers with  
87 SAG101 or PAD4<sup>30</sup>. Genetic and biochemical characterisation of EDS1-SAG101 and EDS1-  
88 PAD4 dimers shows they have distinct functions in immunity<sup>26, 30, 31, 32</sup>. EDS1-SAG101  
89 appears to have coevolved with NRG1 group RNLs to signal specifically in TNL triggered ETI  
90<sup>26</sup>. By contrast, EDS1-PAD4, like ADR1 group RNLs, regulate a basal immunity response  
91 which, in *Arabidopsis*, slows virulent pathogen infection<sup>12, 22, 25, 28, 32, 33</sup> and is utilized for ETI  
92 by TNL and CNL receptors<sup>12, 19, 32</sup>. A major role of *EDS1-PAD4* and *ADR1* RNLs in *Arabidopsis*  
93 basal immunity is to transcriptionally boost a genetically parallel salicylic acid (SA)  
94 phytohormone defence sector, which mediates local and systemic defences and is vulnerable  
95 to pathogen effector manipulation<sup>28, 33, 34</sup>. Recent studies revealed there is functional  
96 cooperation between EDS1-SAG101 and NRG1 RNLs in TNL ETI in *Arabidopsis* and  
97 *Nicotiana benthamiana*, consistent with their co-occurrence in angiosperm phylogenies<sup>26, 29,</sup>  
98<sup>35</sup>. Similarly, *Arabidopsis pad4* and *adr1*-family mutants phenocopy each other in various ETI  
99 and basal immunity responses<sup>25, 26</sup>. Several groups have proposed that EDS1-SAG101 co-  
100 functions with NRG1s, and EDS1-PAD4 with ADR1s, thus constituting two distinct immunity  
101 signalling nodes downstream of NLR activation<sup>21, 25, 26</sup>.

102 Here we present a genetic and biochemical characterization of how *Arabidopsis* NRG1 and  
103 ADR1 RNLs co-function with EDS1 family members in NLR triggered immunity. We show in  
104 *Arabidopsis* that *EDS1-SAG101-NRG1s* and *EDS1-PAD4-ADR1s* operate genetically as non-  
105 interchangeable signalling nodes in ETI. By performing immunoprecipitation and mass  
106 spectrometry analyses of *Arabidopsis* stable transgenic lines, we detect induced specific  
107 NRG1 association with EDS1 and SAG101 proteins and ADR1 association with EDS1 and  
108 PAD4 after TNL activation. We find in *Arabidopsis* stable transgenic lines and in *N.*  
109 *benthamiana* reconstitution assays that PTI activation is insufficient for NRG1-induced

110 association with EDS1 and SAG101. We further discover that key functional elements of both  
111 the EDS1-SAG101 heterodimer and NRG1 are necessary to form a functional protein  
112 complex. Our data provide a first molecular insight to two functionally different RNL signalling  
113 nodes operating with specific EDS1-family members to execute defences downstream of NLR  
114 receptor activation.

115

## 116 **Results**

### 117 **Distinct *PAD4-ADR1* and *SAG101-NRG1* modules operate in *Arabidopsis* TNL<sup>RRS1-RPS4</sup>** 118 **immunity**

119 We tested in *Arabidopsis* whether individual components of the proposed *EDS1-PAD4-ADR1s*  
120 and *EDS1-SAG101-NRG1s* immunity modules<sup>25, 26</sup> are genetically interchangeable. We  
121 reasoned that replacement of *ADR1* by *NRG1* group members, and reciprocally *PAD4* by  
122 *SAG101*, would reveal cross-utilization of components. Combinations of previously  
123 characterized *Arabidopsis* *EDS1* family mutants (*pad4*, *sag101*, and *pad4 sag101*) with *ADR1*  
124 (*adr1 adr1-L1 adr1-L2*, denoted *a3*)<sup>22</sup> or *NRG1* group (*nrg1.1* and *nrg1.2*; denoted *n2*)<sup>26</sup>  
125 mutants were generated in accession Col-0 (Col). This produced mutant groups I, II and III  
126 (Fig. 1a), with group III containing between-module combinations. Group I, II and III mutants  
127 were tested for TNL<sup>RRS1-RPS4</sup> mediated resistance to *Pst avrRps4* infection in leaves, measured  
128 against wild-type Col-0 (Col, resistant), an *rrs1a rrs1b* (*rrs1ab*) mutant defective specifically in  
129 TNL<sup>RRS1-RPS4</sup> ETI<sup>36</sup>, as well as *eds1* and an *a3 n2* 'helperless' mutant which are both fully  
130 susceptible to *Pst avrRps4*<sup>12, 19, 25, 26</sup>. In *Pst avrRps4* growth assays, *pad4 a3* phenocopied  
131 the partial resistance of *pad4* and *a3* single mutants, and *sag101 n2* phenocopied *sag101* and  
132 *n2* full resistance (Fig. 1b, c). The cross-pathway *pad4 n2* and *sag101 a3* combinations in  
133 Group III were as susceptible as *eds1*, *pad4 sag101* and *a3 n2* mutants (Fig. 1b, c). We further  
134 tested group I, II and III mutants for host cell death responses to *Pf0-1* delivering *avrRps4*,  
135 visually at 24 h post infiltration (hpi) (Supplementary Fig. 1a) and by quantitative electrolyte  
136 leakage assays over 6 - 24 hpi (Supplementary Fig. 1b). This produced the same phenotypic  
137 clustering of mutants as the *Pst avrRps4* resistance assays. Put together, these data show  
138 that there is exclusive cooperation between *PAD4* and *ADR1* RNLs in a single pathway  
139 leading to restriction of bacterial growth, and between *SAG101* and *NRG1* RNLs in promoting  
140 host cell death and resistance in TNL<sup>RRS1-RPS4</sup> immunity. Furthermore, the data argue strongly  
141 against physiologically relevant cross-utilization of components between the *PAD4-ADR1s*  
142 and *SAG101-NRG1s* signalling modules.

143

Figure 1

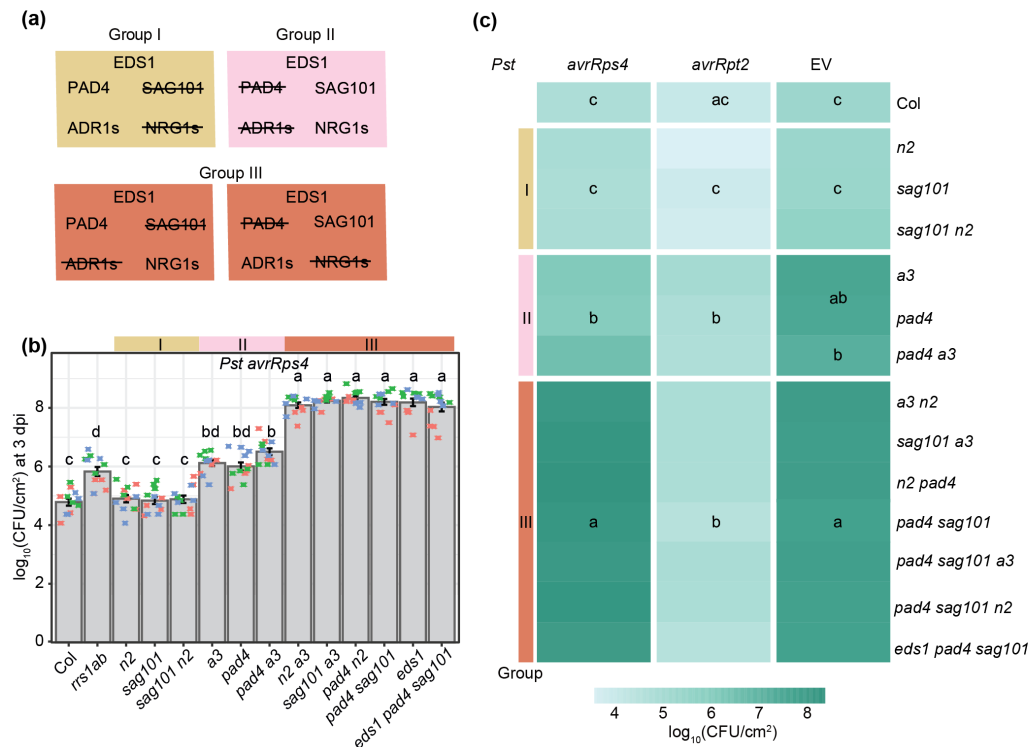

**Fig. 1. Distinct PAD4/ADR1s and SAG101/NRG1s-dependent mechanisms in Arabidopsis TNL immunity.** (a) Overview of mutants used in (b) and (c). Group I comprises mutants disabled in SAG101 and/or NRG1s: *sag101*, *nrg1.1 nrg1.2 (n2)* and *sag101 n2*. Group II has mutants in PAD4 and/or ADR1s: *pad4*, *adr1 adr1-L1 adr1-L2 (a3)* and *pad4 a3*. Group III is composed of cross-branch combinatorial mutants *a3 n2*, *sag101 a3*, *pad4 n2*, *pad4 sag101*, *sag101 pad4 a3*, *sag101 pad4 n2*, *eds1 pad4 sag101*. (b) Growth of *Pseudomonas syringae* pv. *tomato* DC3000 (*Pst avrRps4*) in leaves of *Arabidopsis* Col-0 (Col) and indicated mutants at 3 days post inoculation (dpi) via syringe infiltration (OD<sub>600</sub>=0.0005). Bacterial loads are shown as  $\log_{10}$  colony-forming units (CFU) per cm<sup>2</sup>. Experiments were performed three times independently with four replicates each (Tukey's HSD,  $\alpha=0.001$ , n=12). (c) Growth of *Pst avrRps4*, *Pst avrRpt2* or *Pst* (empty vector, EV) in indicated *Arabidopsis* lines at 3 dpi via syringe infiltration (OD<sub>600</sub>=0.0005). Heatmap represents mean  $\log_{10}$ -transformed CFU values from three independent experiments, each with four replicates (n=12). Statistical significance codes are assigned based on Tukey's HSD ( $\alpha=0.001$ , n=12). The jitter plot in (b) shows individual data points used to calculate means on the heatmap for *Pst avrRps4* infection. *sag101 a3* and *pad4 n2* phenocopy *pad4 sag101* and *a3 n2*, indicating that SAG101 does not form functional signalling modules with ADR1s, and NRG1s with PAD4.

144

145

146 **The *Arabidopsis* EDS1-SAG101-NRG1s node is dispensable for CNL<sup>RPS2</sup> effector-**  
147 **triggered immunity**

148 RPS2-mediated resistance to *Pst avrRpt2* was compromised only when *PAD4* or *ADR1* RNLs  
149 were mutated in group I, II and III mutants, and there was no measurable contribution of  
150 *SAG101* or *NRG1* RNLs to RPS2 immunity, even in a *pad4 a3* background (Fig. 1c). In  
151 quantitative electrolyte leakage assays we detected equivalent contributions of *PAD4* and  
152 *ADR1* RNLs to host cell death at 6 and 8 hpi, but not later at 24 hpi (Supplementary Fig. 1c),  
153 as seen previously for *pad4* and *eds1* mutants<sup>33</sup> and *a3*<sup>12</sup>. Importantly, *PAD4* and *ADR1*s  
154 early promotion of RPS2 cell death could not be substituted by *SAG101* or *NRG1*s in any of  
155 the mutant lines (Supplementary Fig. 1c). We concluded that EDS1-PAD4 also work together  
156 with *ADR1*s in a single pathway to promote CNL<sup>RPS2</sup>-triggered early host cell death and that  
157 *SAG101* and *NRG1*s are not recruited for CNL<sup>RPS2</sup> ETI, even when *PAD4* and *ADR1*s are  
158 disabled.

159 Next we investigated whether recruitment of *PAD4* and *ADR1*s and apparent non-utilization  
160 of *SAG101* and *NRG1*s in RPS2-triggered immunity is masked by the genetically parallel  
161 *ICS1*-dependent SA pathway<sup>22, 32, 33, 37</sup>. For this, we introduced an *ics1* (*sid2*) mutation into  
162 the single-module (*pad4 a3, sag101 n2*) and cross-module (*pad4 n2* and *sag101 a3*) mutant  
163 backgrounds (Fig. 2a). Loss of *ICS1* did not alter the different dependencies of TNL<sup>RRS1-RPS4</sup>  
164 or CNL<sup>RPS2</sup> on *PAD4-ADR1*s and *SAG101-NRG1*s in bacterial resistance (Fig. 2a;  
165 Supplementary Fig. 2a-d). We concluded that *PAD4-ADR1*s and *SAG101-NRG1*s distinctive  
166 contributions to resistance mediated by these TNL and CNL receptors are independent of  
167 *ICS1*-generated SA.

168 We further tested whether a possible *SAG101* and *NRG1*s role in basal resistance against *Pst*  
169 (Fig. 1c,<sup>12, 25</sup>) is redundant with and therefore masked by the SA and *PAD4-ADR1*s sectors  
170<sup>13, 22, 38</sup>. We found that *sag101* and *n2* mutations did not increase *sid2*, *sid2 pad4* and *sid2 a3*  
171 susceptibility to *Pst* (Fig. 2a, Supplementary Fig. 2e, f). Therefore, *SAG101* and *NRG1*s do  
172 not contribute to *Arabidopsis* resistance to *Pst* bacteria in a susceptible interaction.

173 **Removal of the SAG101-NRG1 and ICS1 sectors reveals PAD4-ADR1s promoted TNL**  
174 **cell death**

175 *SAG101* and *NRG1*s are dispensable for TNL<sup>RRS1-RPS4</sup> resistance unless *PAD4* and/or *ADR1*s  
176 are disabled (Fig. 1b, 2a; Supplementary Fig. 2a, b), consistent with unequal contributions of  
177 these two branches in TNL immunity<sup>12, 19, 25, 26</sup>. We used the *Arabidopsis* combinatorial  
178 mutants with *sid2* (Fig. 2a) to explore whether *ICS1*-synthesized SA affects *PAD4-ADR1*s or  
179 *SAG101-NRG1*s involvement in TNL<sup>RRS1-RPS4</sup> triggered host cell death. In quantitative  
180 electrolyte leakage assays over 6 - 24 hpi and macroscopically at 24 hpi, *pad4, a3, sid2, pad4*

181 *sid2* and *a3 sid2* mutants displayed similar leaf cell death responses as wild-type Col (Fig. 2  
182 b, c). Therefore, *PAD4* and *ADR1s* are dispensable for TNL<sup>RRS1-RPS4</sup> cell death, regardless of  
183 *ICS1*-dependent SA status. While *n2* and *sag101* mutants had strongly reduced host cell  
184 death, as expected<sup>12, 19, 26</sup>, we observed a cell death response similar to that of wild-type Col  
185 in *sag101 sid2* and *n2 sid2* backgrounds (Fig. 2b, c). This restored cell death was abolished  
186 in *pad4 sag101 sid2* and *a3 n2 sid2* mutants (Fig. 2b, c). We concluded that an *EDS1-PAD4-*  
187 *ADR1s* controlled mechanism can lead to host cell death in TNL<sup>RRS1-RPS4</sup> immunity that is likely  
188 antagonised or restricted by combined *EDS1-SAG101-NRG1s* and SA functions.

189 SA was found to conditionally suppress leaf cell death promoted by metacaspase 1 (MC1) in  
190 CNL RPM1 ETI<sup>39</sup>, and *MC1*, *PAD4* or *ADR1s* promoted runaway cell death caused by the  
191 loss of *Lesion Simulating Disease1 (LSD1)*<sup>22, 40, 41, 42</sup>. Therefore, we tested whether MC1 is  
192 required for *PAD4-ADR1s* dependent TNL<sup>RRS1-RPS4</sup> cell death restored in *sag101 sid2* (Fig. 2b,  
193 c). For this, we generated a *sag101 sid2 mc1* triple mutant and measured its cell death  
194 phenotype alongside *mc1* and *pad4 sid2 mc1* lines. The *mc1* mutation did not compromise  
195 *SAG101* or *PAD4* promoted TNL cell death (Supplementary Fig. 3), suggesting that *MC1* is  
196 dispensable for both *SAG101-NRG1s*- and *PAD4-ADR1s*-driven cell death outputs in TNL  
197 triggered bacterial immunity. Collectively, these data suggest that *EDS1-SAG101-NRG1s* and  
198 *EDS1-PAD4-ADR1s* are genetically hard-wired signalling modules in NLR immunity that react  
199 differently to *ICS1*-generated SA.

200



Figure 2

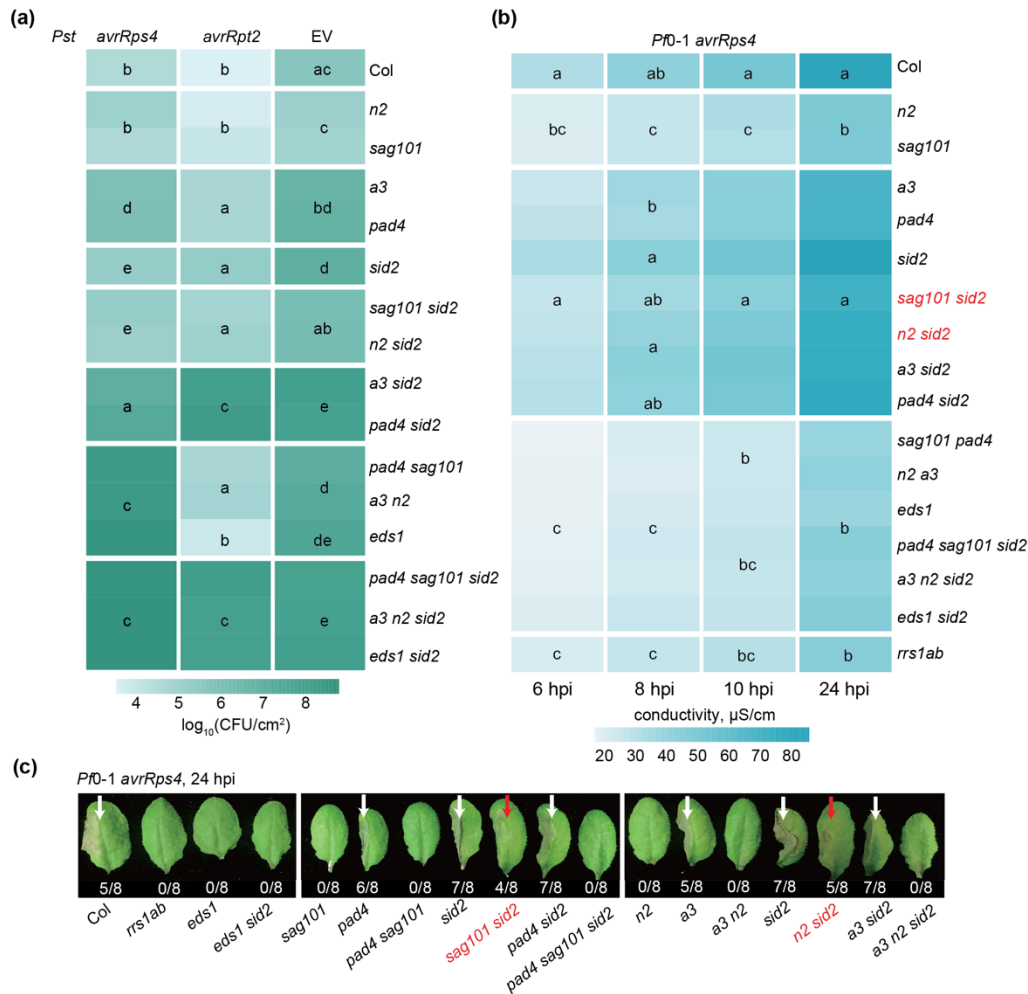

**Fig. 2. PAD4 with ADR1s promotion of TNL<sup>RRS1-RPS4</sup> cell death is exposed in lines with non-functional ICS1 and SAG101-NRG1s.** (a) A heatmap representation of *Pst avrRps4*, *Pst avrRpt2* or *Pst* (empty vector, EV) growth at 3 dpi in leaves of indicated genotypes (syringe infiltration OD<sub>600</sub>=0.0005). The significance codes are based on the Tukey's HSD test ( $\alpha=0.001$ ,  $n=12-16$ ). Data points were combined from three (*Pst avrRps4*, *Pst avrRpt2*) or four (*Pst*) independent experiments, each with four replicates. (b) A heatmap of quantitative cell death assays conducted on leaves of indicated genotypes after infiltration utilizing the *Pseudomonas fluorescens* 0-1 effector tester strain (hereafter *Pf0-1*) delivering *avrRps4* (OD<sub>600</sub>=0.2). Cell death was measured by electrolyte leakage from bacteria-infiltrated leaf discs at 6, 8, 10 and 24 hpi. Data are displayed as means from four experiments, each with four replicates ( $n=16$ ). Statistical significance codes for the difference in means are based on Tukey's HSD test ( $\alpha=0.001$ ). In mutants marked in red, the PAD4-ADR1s cell death branch operates in TNL<sup>RRS1-RPS4</sup> immunity when SAG101-NRG1s and ICS1 pathways are not functional. (c) Visual cell death symptoms at 24 hpi *Pf0-1 avrRps4* infiltrating into leaf halves of indicated genotypes as in (b). The ratio beneath each leaf indicates number of leaves with visible tissue collapse from all infiltrated leaves in two independent experiments. White arrows mark cell death visible as tissue collapse in a manner dependent on SAG101-NRG1s. Red arrows mark cell death in lines without functional SAG101-NRG1s and ICS1.

201

202

203 **PAD4 and SAG101 interact respectively with ADR1s and NRG1s after TNL activation in**  
204 ***Arabidopsis***

205 We tested whether the genetic co-requirement of *EDS1-PAD4-ADR1s* and *EDS1-SAG101-*  
206 *NRG1s* results from specific molecular associations. We generated complementing  
207 *pPAD4:YFP-PAD4* and *pSAG101:SAG101-YFP* stable transgenic lines in a Col *pad4 sag101*  
208 double mutant background (Supplementary Fig. 4) to test whether each EDS1 partner  
209 associates with similar or different RNL proteins in the TNL ETI response. These two lines  
210 and a Col *p35S:YFP-StrepII-3xHA* (YFP-SH) control were infiltrated with *Pf0-1 avrRps4*. *Pf0-*  
211 *1 avrRps4*-elicited leaf total soluble extracts were processed at 6 hpi because *EDS1-*  
212 dependent transcriptional reprogramming starting at ~ 4 hpi is critical for RRS1-RPS4  
213 resistance<sup>12, 13, 32, 43</sup>. SAG101-YFP, YFP-PAD4 and YFP-SH proteins were purified via  
214 immunoprecipitation (IP) with GFP-trap agarose beads. Liquid chromatography and mass-  
215 spectrometry (MS) (LC-MS) analyses showed strong enrichment of the two Col-0 native  
216 EDS1A and EDS1B isoforms in both SAG101-YFP or YFP-PAD4 samples (Fig. 3a), as  
217 expected from earlier studies<sup>30, 31, 44, 45</sup>. EDS1A and EDS1B were also detected at a low level  
218 in YFP-SH control IPs (Fig. 3a), consistent with EDS1 weak non-specific association when its  
219 direct partners (PAD4 and SAG101) are missing<sup>45, 46</sup>. NRG1.1 and NRG1.2 peptides were  
220 highly enriched in SAG101-YFP but not YFP-PAD4 or YFP-SH samples. Notably, peptides  
221 derived from NRG1.3, a truncated NRG1 isoform that does not contribute genetically to TNL  
222 ETI responses<sup>25</sup>, were enriched in SAG101-YFP IPs, and less strongly with YFP-PAD4 (Fig.  
223 3a, Supplementary Fig. 5). By contrast, ADR1-L1 and ADR1-L2 co-purified with YFP-PAD4  
224 but were not detected in SAG101-YFP or YFP-SH IP samples (Fig. 3a, Supplementary Fig.  
225 5), suggesting that ADR1 group RNLs interact preferentially with PAD4 over SAG101 at 6 hpi.  
226 Put together, the *Arabidopsis* IP-MS analyses show that EDS1-PAD4 and EDS1-SAG101  
227 dimers interact specifically with RNLs in TNL-induced tissues at 6 hpi. The observed  
228 preferential association of PAD4 with ADR1-L1 and ADR1-L2, and SAG101 with NRG1.1 and  
229 NRG1.2, further suggests that EDS1-PAD4 and EDS1-SAG101 associations with specific  
230 helper RNL types underpin these genetically distinct *Arabidopsis* immunity modules.

231

Figure 3

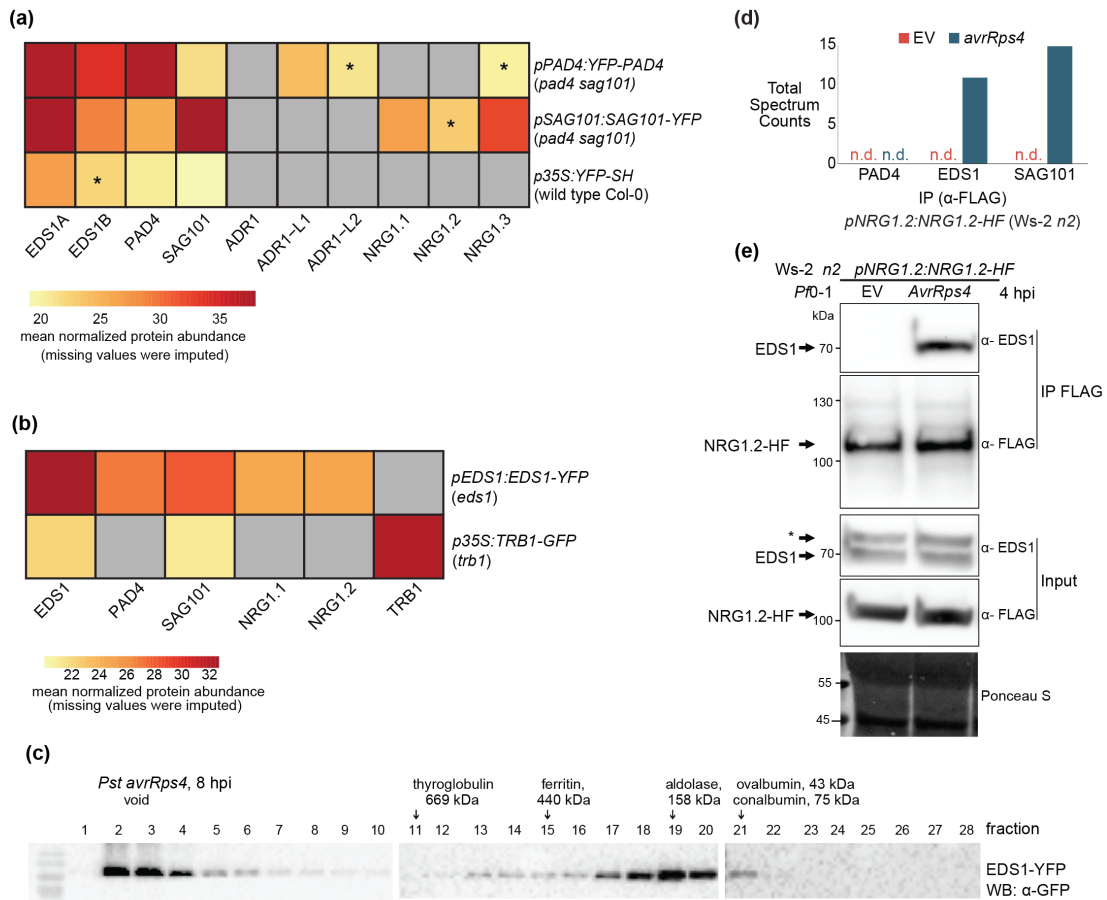

**Fig. 3. Early effector-dependent NRG1 association with EDS1 and SAG101 in Arabidopsis TNL<sup>RRS1-RPS4</sup> triggered ETI.**

**(a)** Heat map of normalized abundance values (LFQ, log<sub>2</sub>-scaled) for proteins detected in liquid chromatography mass-spectrometry (LC-MS) analyses after α-GFP immunoprecipitation (IP) of PAD4-YFP or SAG101-YFP from total leaf extracts of respective complementation lines *pPAD4:YFP-PAD4* and *pSAG101:SAG101-YFP* (both Col *pad4 sag101* background) after infiltration with *Pf0-1 avrRps4* (6 hpi, OD<sub>600</sub>=0.2). ADR1s are specifically enriched in YFP-PAD4 IP samples, whereas NRG1s are more abundant in the SAG101-YFP IP samples. Samples were collected from four independent experiments. All protein values shown |Δlog<sub>2</sub>LFQ|≥1, p≤0.05 (relative to YFP-SH IP). Asterisks indicate detection in three of four replicates. Grey indicates not detected or detected in <3 of 4 replicates. **(b)** Heat map of LFC values for proteins detected in LC-MS analyses after IP of EDS1-YFP and TRB1-GFP from nuclei-enriched extracts of corresponding *Arabidopsis* complementation lines (García et al., 2010; Zhou et al., 2016) infiltrated with *Pst avrRps4* (8 hpi, OD<sub>600</sub>=0.1). NRG1.1 and NRG1.2 are specifically enriched in EDS1-YFP samples. Samples were collected from four independent experiments. All shown protein |Δlog<sub>2</sub>LFQ|≥1, p≤0.05 (relative to TRB1-GFP IP). Grey means the protein is not detected or detected in <3 of 4 replicates. **(c)** α-GFP probed immunoblots of nuclei-enriched extracts from leaves of the *Arabidopsis pEDS1:EDS1-YFP* complementation line (Col *eds1* background) infiltrated with *Pst avrRps4* (OD<sub>600</sub>=0.1, 8 hpi). Extracts were resolved using native gel filtration. Arrows below protein markers indicate position of the corresponding peak. Numbers refer to column fractions. EDS1 forms stable ~100-600 kDa complexes. The experiment was repeated three times with similar results. **(d)** LC-MS analysis of eluates after α-FLAG IP of total leaf extracts from *Arabidopsis Ws-2 n2 pNRG1.2:NRG1.2-HF* complementation line (Castel et al., 2019) infiltrated with *Pf0-1 EV* or *Pf0-1 avrRps4* (4 hpi, OD<sub>600</sub>=0.3). Peptides corresponding to EDS1 and SAG101 were observed in eluates only after *Pf0-1* mediated delivery of *avrRps4*. This result was observed in two independent experiments. **(e)** Immunoblot analysis of eluates from (d). Asterisk indicates a nonspecific band on the α-EDS1 blot for input samples. The analysis was performed on total leaf extracts and was repeated four times with similar results. Association of EDS1 with NRG1.2-HF was observed only after *Pf0-1*-mediated delivery of *avrRps4*. Ponceau S staining shows equal protein loading in input samples on the blot.

232

233

234 **Early effector dependent NRG1 association with EDS1 and SAG101 in *Arabidopsis***

235 To investigate whether the RNLs associate with EDS1, we enriched for EDS1 protein from a  
236 transgenic Col *eds1* line expressing *pEDS1:EDS1-YFP*<sup>43</sup> at 8 h after infiltrating leaves with  
237 *Pst avrRps4* bacteria and preparing nuclear-enriched extracts. Garcia et al (2010)  
238 demonstrated the importance of an EDS1 nuclear pool for gene expression reprogramming in  
239 TNL<sup>RRS1-RPS4</sup> triggered ETI<sup>43</sup>. To interrogate protein associations with EDS1, we  
240 immunoprecipitated EDS1-YFP using GFP-trap agarose beads and analyzed co-purified  
241 proteins via LC-MS. GFP-trap purification and LC-MS processing of eluates from a Col mutant  
242 in *Telomere Repeat Binding 1 (TRB1)* expressing nuclear localized TRB1-GFP<sup>47</sup> was used  
243 as a control for non-specific associations (Fig. 3b, Supplementary Fig. 6). PAD4 and SAG101  
244 were highly enriched in EDS1-YFP relative to TRB1-GFP pulldowns, as represented in a  
245 volcano plot (Supplementary Fig. 6), and consistent with EDS1 stable PAD4 or SAG101  
246 dimers persisting in a TNL<sup>RRS1-RPS4</sup> ETI response<sup>44, 45</sup>. NRG1.1 and NRG1.2 proteins were  
247 also specifically enriched in EDS1-YFP compared to TRB1-GFP samples (Fig. 3b). We did  
248 not detect any of the three functional *Arabidopsis* ADR1 isoforms, ADR1, ADR1-L1 and ADR1-  
249 L2<sup>22</sup> (Fig. 3b). In the nuclei-enriched protein extracts separated by native size exclusion  
250 chromatography, EDS1-YFP eluted between ~50 and ~600 kDa (Fig. 3c). An EDS1-YFP peak  
251 at ~160 kDa with a higher molecular weight tail is consistent with EDS1 forming stable  
252 exclusive heterodimers with PAD4 or SAG101<sup>30, 31, 45</sup> and sub-stoichiometric higher order  
253 complexes (Fig. 3c). Together, these data suggest that NRG1.1 and NRG1.2 also interact with  
254 EDS1 in TNL<sup>RRS1-RPS4</sup> activated cells.

255 We also tested whether the association of NRG1 group RNLs with EDS1 and SAG101 is  
256 dependent on TNL<sup>RRS1-RPS4</sup> activation using an *Arabidopsis* *Ws-2 n2* complementation line  
257 expressing *pNRG1.2:NRG1.2-6xHis-3xFLAG (NRG1.2-HF)*<sup>19</sup>. Leaves were infiltrated with  
258 *Pf0-1* bacteria delivering *avrRps4 (Pf0-1 avrRps4)* to activate RRS1-RPS4 ETI or *Pf0-1* with  
259 an empty vector (EV) as a negative control eliciting PTI<sup>48, 49</sup>. Soluble extracts from *Pf0-1* EV  
260 and *Pf0-1 avrRps4*-infiltrated leaves at 4 hpi were processed to monitor early changes during  
261 the *EDS1*-dependent transcriptional reprogramming in TNL<sup>RRS1-RPS4</sup> resistance<sup>12, 13, 32, 43, 49</sup>.  
262 After NRG1.2-HF immunopurification on  $\alpha$ -FLAG agarose beads, LC-MS analysis revealed  
263 spectra for peptides derived from EDS1 and SAG101 in elution products isolated from *Pf0-1*  
264 *avrRps4* but not *Pf0-1* (EV) treated tissues (Fig. 3d). Notably, no PAD4 peptides were  
265 identified in the analysis. Elution products resolved by SDS-PAGE and probed with  $\alpha$ -FLAG  
266 and  $\alpha$ -EDS1 antibodies also revealed an association of EDS1 with NRG1.2, dependent upon  
267 *Pf0-1* delivery of *avrRps4* (Fig. 3e). Importantly, no association between NRG1.2 and EDS1  
268 or SAG101 was detected at 4 hpi with *Pf0-1* alone, indicating that a PTI response<sup>15, 16, 50</sup> is  
269 insufficient to induce NRG1 association with EDS1 and SAG101 (Fig 3d, e). These data show

270 that TNL<sup>RRS1-RPS4</sup> activation induces NRG1.2 associations with EDS1 and SAG101, but not  
271 PAD4, in *Arabidopsis*.

272 **XopQ/Roq1-dependent *Arabidopsis* NRG1.1 association with EDS1 and SAG101 in *N.***  
273 ***benthamiana***

274 Previously, transient co-expression of *Arabidopsis* EDS1, SAG101 and NRG1.1 or NRG1.2  
275 proteins in an *N. benthamiana* CRISPR *eds1a pad4 sag101a sag101b* (*Nb-epss*) mutant  
276 reconstituted host cell death and bacterial resistance after TNL<sup>Roq1</sup> recognition of the bacterial  
277 effector XopQ<sup>26, 51</sup>. We exploited the *Nb-epss* transient assay system to investigate molecular  
278 requirements for *Arabidopsis* EDS1, SAG101, NRG1s associations and functions in ETI. For  
279 this, we developed an ETI assay in *Nb-epss* leaves with more precise timing of the TNL<sup>Roq1</sup>  
280 dependent response than previously achieved using only *Agrobacteria*-mediated expression  
281 of various components<sup>26</sup>. In the modified assay, we transiently expressed combinations of  
282 epitope tagged proteins into *Nb-epss* leaf zones using *Agrobacteria* and, after 48 h, infiltrated  
283 *Pf0-1 XopQ* bacteria to activate TNL<sup>Roq1</sup> immunity (Fig. 4a). Co-expression of *Arabidopsis*  
284 EDS1-FLAG, SAG101-FLAG and NRG1.1-SH led to XopQ-dependent host cell death  
285 quantified in electrolyte leakage assays at 24 hpi (Fig. 4b). In this ETI assay, replacement of  
286 *Arabidopsis* NRG1.1-SH by ADR1-L2-SH or co-expression of GUS-FLAG with NRG1.1-SH  
287 did not lead to XopQ triggered host cell death (Fig. 4b), consistent with PAD4 being  
288 dispensable for TNL immune responses in *N. benthamiana*<sup>26, 29</sup>, even with a *Pf0-1* stimulus.

289

Sun, Lapin, Feehan et al., Triggered NRG1-EDS1-SAG101 association

Figure 4

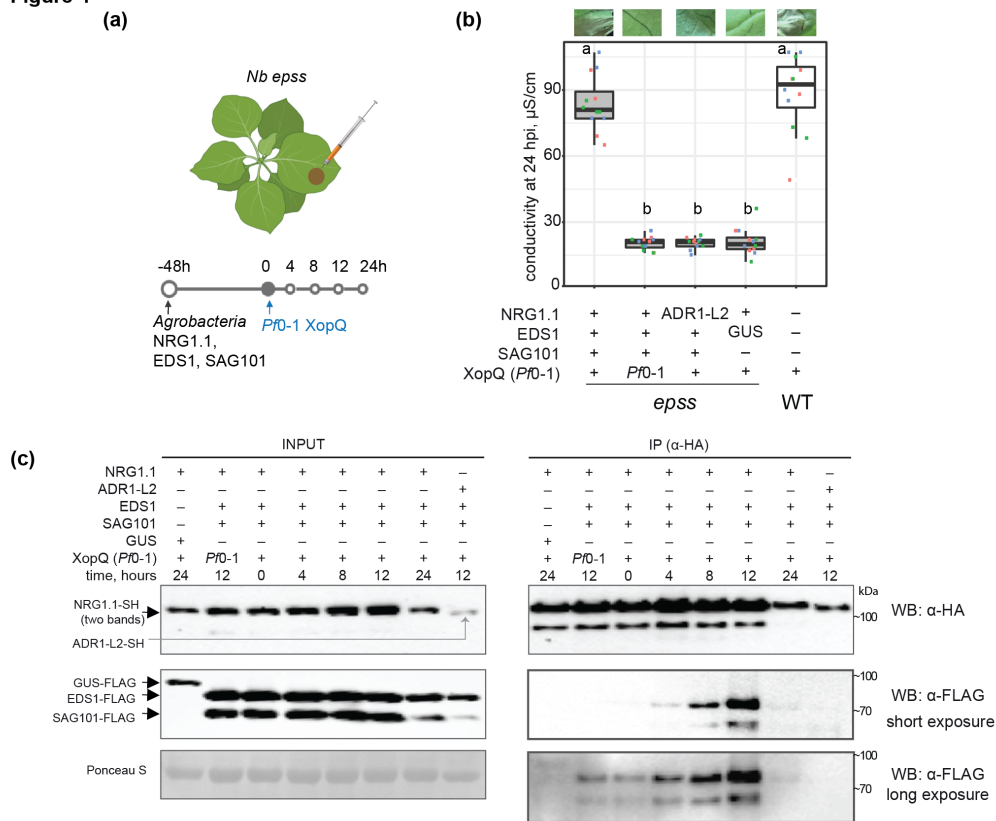

**Fig. 4. TNL<sup>Roq1</sup> effector recognition-dependent *Arabidopsis* NRG1 association with EDS1 and SAG101 in *N. benthamiana*.** (a) Sample collection scheme for experiments in (b) and (c). Roq1-dependent cell death is restored in the *Nb eds1 pad4 sag101a sag101b* (*Nb-epss*) signalling deficient mutant by expressing *Arabidopsis* EDS1, SAG101 and NRG1.1 via *Agrobacteria* infiltration 48 h before XopQ effector delivery. *Pf0-1 XopQ* is syringe-infiltrated ( $\text{OD}_{600}=0.3$ ) to deliver the effector in a time-resolved manner and study TNL signalling events up to 24 hpi. (b) Macroscopic symptoms and quantification of XopQ-triggered cell death at 24 hpi after infiltrating *Pf0-1 XopQ* in leaves of *Nb-epss* expressing *Arabidopsis* EDS1-FLAG, SAG101-FLAG, NRG1.1-3xHA-StrepII (NRG1.1-SH) or ADR1-L2-3xHA-StrepII (ADR1-L2-SH). *Pf0-1* served as a “no-ETI” control. Cell death was quantified in electrolyte leakage assays 6 h after harvesting leaf discs (24 hpi with *Pf0-1 XopQ*). The experiment was performed three times independently, each with four technical replicates (leaf discs) (Tukey’s HSD,  $\alpha=0.001$ ,  $n=12$ ). Transiently expressed *Arabidopsis* EDS1, SAG101 and NRG1.1 proteins are functional in *Pf0-1 XopQ* triggered (Roq1) cell death. (c) Coimmunoprecipitation assay followed by Western blotting to test for XopQ-triggered associations between *Arabidopsis* NRG1.1-SH and FLAG-tagged EDS1 or SAG101 in *Nb-epss* according to the infiltration scheme in (a). NRG1.1-SH or ADR1-SH were enriched using  $\alpha$ -HA agarose beads, and presence of FLAG-tagged EDS1, SAG101 or GUS was tested by probing blots with  $\alpha$ -FLAG antibodies. IP assays were repeated three times independently with similar results. NRG1.1 association with EDS1 and SAG101 requires Roq1/XopQ ETI activation.

290

291

292 We performed a time course to monitor the accumulation and associations of NRG1.1-SH with  
293 EDS1-FLAG and SAG101-FLAG in *Nb-epss* leaf samples harvested at 4, 8, 12 and 24 h after  
294 *Pf0-1 XopQ* inoculation. Although protein inputs were similar in all samples, NRG1.1-SAG101  
295 and NRG1.1-EDS1 association was detected in  $\alpha$ -HA immunopurified samples only at 8 and  
296 12 hpi with *Pf0-1 XopQ* (Fig. 4c). The immunoprecipitation (IP) signals were no longer  
297 detectable at 24 hpi, suggesting that *Pf0-1 XopQ* induced NRG1 association with EDS1 and  
298 SAG101 is transient and/or disrupted by host cell death at 24 hpi (Fig. 4b, c). As in  
299 *Arabidopsis*, no association between NRG1.1 and EDS1 or SAG101 was detected at 12 hpi  
300 with *Pf0-1* alone (Fig. 4c), further indicating that a PTI response in *N.benthamiana* is  
301 insufficient to induce NRG1 association with EDS1 and SAG101. Similarly, when *Arabidopsis*  
302 ADR1-L2-SH was expressed instead of NRG1.1-SH in the *Nb-epss* TNL<sup>Roq1</sup> ETI assay, it did  
303 not interact with SAG101-FLAG or EDS1-FLAG at 12 hpi (Fig. 4c), mirroring the failure of  
304 ADR1-L2 to signal Roq1-triggered host cell death or bacterial resistance in *N. benthamiana*  
305 (Fig. 4b; <sup>26</sup>). These data show that XopQ activation of TNL<sup>Roq1</sup> in *Nb-epss* leaves is necessary  
306 to induce NRG1.1 association with SAG101 and EDS1 proteins from *Arabidopsis*. The  
307 similarity between *Arabidopsis* EDS1 family protein associations with RNLs observed in native  
308 *Arabidopsis* (Fig. 3) and non-native *N. benthamiana* (Fig. 4) suggests that interaction  
309 specificity determines function of *Arabidopsis* EDS1-SAG101-NRG1s module in TNL  
310 immunity. Analyses in both systems also show that a PTI stimulus alone is insufficient for  
311 NRG1 association with EDS1 and SAG101.

### 312 **Effector-dependent *Arabidopsis* NRG1 association with EDS1 and SAG101 requires a** 313 **functional EDS1 EP domain**

314 Assembly of *Arabidopsis* EDS1 heterodimers with PAD4 or SAG101 is mediated by a short  
315 N-terminal EDS1  $\alpha$ -helix ( $\alpha$ H) fitting into an N-terminal hydrophobic groove of either partner <sup>30</sup>.  
316 <sup>32, 46</sup>. Protein structure-function studies of *Arabidopsis* and tomato EDS1-SAG101 complexes  
317 showed that the heterodimer brings into close proximity two  $\alpha$ -helical coils (EDS1  $\alpha$ P and  
318 SAG101  $\alpha$ N) on the partner C-terminal 'EP' domains, which are essential for TNL ETI  
319 signalling <sup>26, 29, 30, 32</sup>. *Arabidopsis* EDS1 residues F419 and H476 are positioned close to  
320 SAG101  $\alpha$ N in the dimer cavity (Fig. 5a) <sup>26</sup>. In earlier *Agrobacteria*-only based *Nb-epss*  
321 reconstitution assays, an *Arabidopsis* EDS1<sup>F419E</sup> mutation disabled TNL<sup>Roq1</sup> signalling without  
322 disrupting the EDS1-SAG101 heterodimer <sup>26</sup>. In the *Agrobacteria* plus *Pf0-1 XopQ* TNL<sup>Roq1</sup>  
323 assay (Fig. 4a), *Arabidopsis* EDS1<sup>F419E</sup>-FLAG and EDS1<sup>H476Y</sup>-FLAG single amino acid  
324 exchange variants failed to mediate XopQ/Roq1-dependent host leaf cell death at 24 hpi or  
325 *Xanthomonas euvesicatoria* (formerly, *Xanthomonas campestris* pv. *vesicatoria*, *Xcv*) growth  
326 at 6 dpi (Fig. 5b, c). Also, substituting NRG1.1-SH with ADR1-L2-SH did not confer TNL<sup>Roq1</sup>-  
327 triggered host cell death and *Xcv* resistance (Fig. 5b, c). We monitored the expression of

328 FLAG-tagged EDS1 family proteins by immunoblotting and performed NRG1.1-SH  $\alpha$ -HA IP  
329 assays on *Pf0-1 XopQ* triggered leaf protein extracts at 10 - 12 hpi when TNL-induced  
330 NRG1.1-EDS1 and NRG1.1-SAG101 associations were strongest (Fig. 4c). As negative  
331 controls, PAD4-FLAG was substituted for SAG101-FLAG, GUS-FLAG for EDS1-FLAG, and  
332 ADR-L2-SH for NRG1.1-SH (Fig. 5d). While all proteins were detected in input samples,  
333 NRG1.1 was detected only when NRG1.1-SH was co-expressed together with functional wild-  
334 type EDS1-FLAG and SAG101-FLAG (Fig. 5d). The failure of NRG1.1 to IP SAG101 with GUS  
335 replacing EDS1 (Fig. 5d), indicates that NRG1.1 associates specifically with the EDS1-  
336 SAG101 heterodimer and not individual EDS1 or SAG101 monomers, upon triggering of  
337 TNL<sup>Roq1</sup> ETI. The strong reduction in NRG1.1 association with EDS1 EP domain inactive  
338 variants EDS1<sup>F419E</sup> or EDS1<sup>H476Y</sup> shows that NRG1 fails to associate with a signalling-inactive  
339 EDS1-SAG101 heterodimer after Roq1 activation.

340



Figure 5

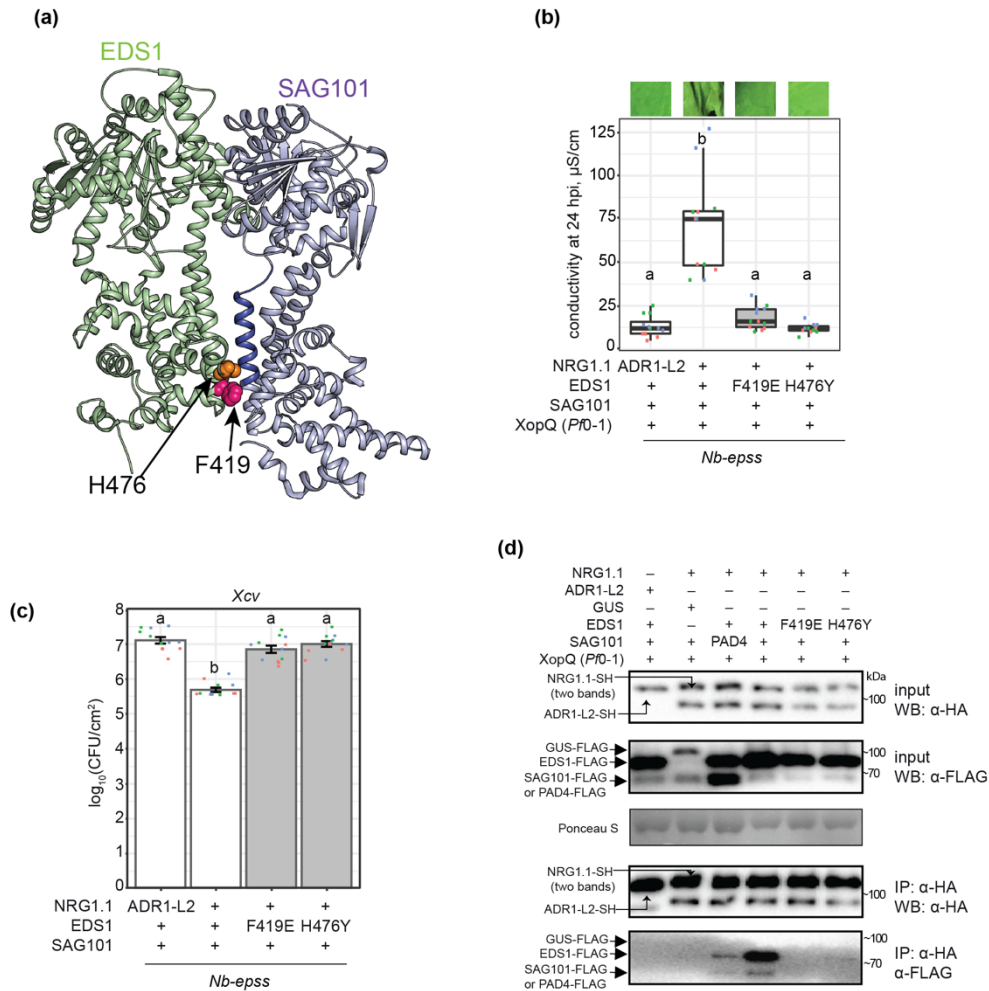

**Fig. 5. Effector-dependent NRG1-EDS1-SAG101 association requires a functional EDS1 EP domain.** (a) Representation of the *Arabidopsis* EDS1 (green) - SAG101 (purple) heterodimer crystal structure (PDB: 4NFU) with highlighted EP-domain cavity surfaces that are essential for TNL triggered cell death (Lapin et al., 2019). An  $\alpha$ -helix of the SAG101 EP domain (blue) and residues F419 (magenta) and H476 (orange) in the EDS1 EP domain are shown as ribbon and spheres, respectively. (b,c) Roq1/XopQ-dependent cell death (b) and bacterial resistance (c) in leaves of *Nb-epss* transiently expressing of C-terminally FLAG-tagged EDS1 wildtype and mutant variants with SAG101-FLAG and NRG1.1-SH or ADR1-L2-SH. Cell death was triggered by infiltrating *P0-1* XopQ at 48 h after *Agrobacteria* infiltration to express the *Arabidopsis* proteins; photos of leaf discs for the electrolyte leakage assays were taken at 24 h. Roq1 resistance to *Xanthomonas campestris* pv. *vesicatoria* (*Xcv*) strain 85-10 expressing XopQ. F419E and H476Y mutations in the *Arabidopsis* EDS1 EP domain abrogated cell death and resistance, as shown in (Lapin et al., 2019) using different plasmid backbones and tags. Experiments were performed three times independently, each with four replicates (leaf discs) (Tukey's HSD,  $\alpha=0.001$ ,  $n=12$ ). (d) IP followed by Western blot analysis to test dependency of associations between *Arabidopsis* EDS1-SAG101 and NRG1.1 in *Nb-epss* on a functional EDS1 EP domain cavity. Leaves of *Nb-epss* were infiltrated with *Agrobacteria* to express FLAG-tagged EDS1 or its variants EDS1F419E and EDS1H476Y, SAG101-FLAG and NRG1.1-SH or PAD4-FLAG, with ADR1-L2-SH and GUS-FLAG as negative controls. At 2 dpi, *P0-1* XopQ ( $OD_{600}=0.3$ ) was infiltrated, and the triggered samples were collected at 10 hpi. Following IP with  $\alpha$ -HA agarose beads, input and IP fractions were probed with  $\alpha$ -HA and  $\alpha$ -FLAG antibodies. Roq1/XopQ-dependent association of NRG1.1-SH with EDS1-FLAG and SAG101-FLAG was abolished in samples with mutated EDS1 EP domain variants. Similar results were obtained in three independent experiments.

341

342

343 **N-terminal residues of *Arabidopsis* NRG1 associating with EDS1 and SAG101 are**  
344 **essential for signalling**

345 We next examined NRG1 molecular features that might influence its TNL signalling function  
346 and association with EDS1-SAG101. Because RNLs have domain architectures similar to  
347 sensor CNL proteins <sup>17</sup>, we modeled NRG1.1 onto the cryo-EM structure of the activated  
348 *Arabidopsis* CNL receptor ZAR1 which forms a pentameric resistosome <sup>7</sup>. The ZAR1 signalling  
349 active pentamer has five exposed N-terminal  $\alpha$ -helices ( $\alpha$ 1) preceding the CC domains of the  
350 NLR protomers, which assemble into a potential membrane associated pore or channel <sup>7</sup>.  
351 Structural modelling of *Arabidopsis* NRG1.1 identified two negatively charged N-terminal  
352 glutamic acid (E) residues (E14 and E27) (Fig. 6a) positioned similarly to ZAR1  $\alpha$ 1-helix  
353 residues E11 and E18 that are part of the ZAR1 inner funnel and are necessary for ZAR1  
354 resistosome activity <sup>7</sup>. Two other NRG1.1 N-terminal residues, leucine 21 (L21) and lysine 22  
355 (K22) (Fig. 6a), aligned with L10 and L14 in the ZAR1  $\alpha$ 1-helix which promoted ZAR1  
356 membrane association and resistosome signalling <sup>7</sup>. Neither set of ZAR1  $\alpha$ 1-helix amino acids  
357 was required for effector induced pentamer assembly <sup>7</sup>. We further identified in *Arabidopsis*  
358 NRG1 RNLs the conserved NLR nucleotide-binding domain (NBD) P-loop (GxxxxGK(T/S))  
359 motif (G<sup>199</sup>K<sup>200</sup>T<sup>201</sup> in *Arabidopsis* AtNRG1.1; Fig. 6a; Supplementary Fig. 7), which mediates  
360 nucleotide binding <sup>52, 53</sup>, and induced self-association and/or signalling functions of several  
361 sensor NLRs <sup>54, 55</sup>. The P-loop was dispensable for ADR1-L2 conferred resistance during ETI  
362 and basal immunity and NRG1.1 conditioned TNL *chs3-2D* auto-immunity <sup>22, 25</sup>, but was  
363 required for ADR1-L2 conditioned *Isd1* mediated cell death and NRG1 dependent TNL<sup>Roq1</sup>  
364 immunity <sup>35, 41</sup>.

365

Figure 6

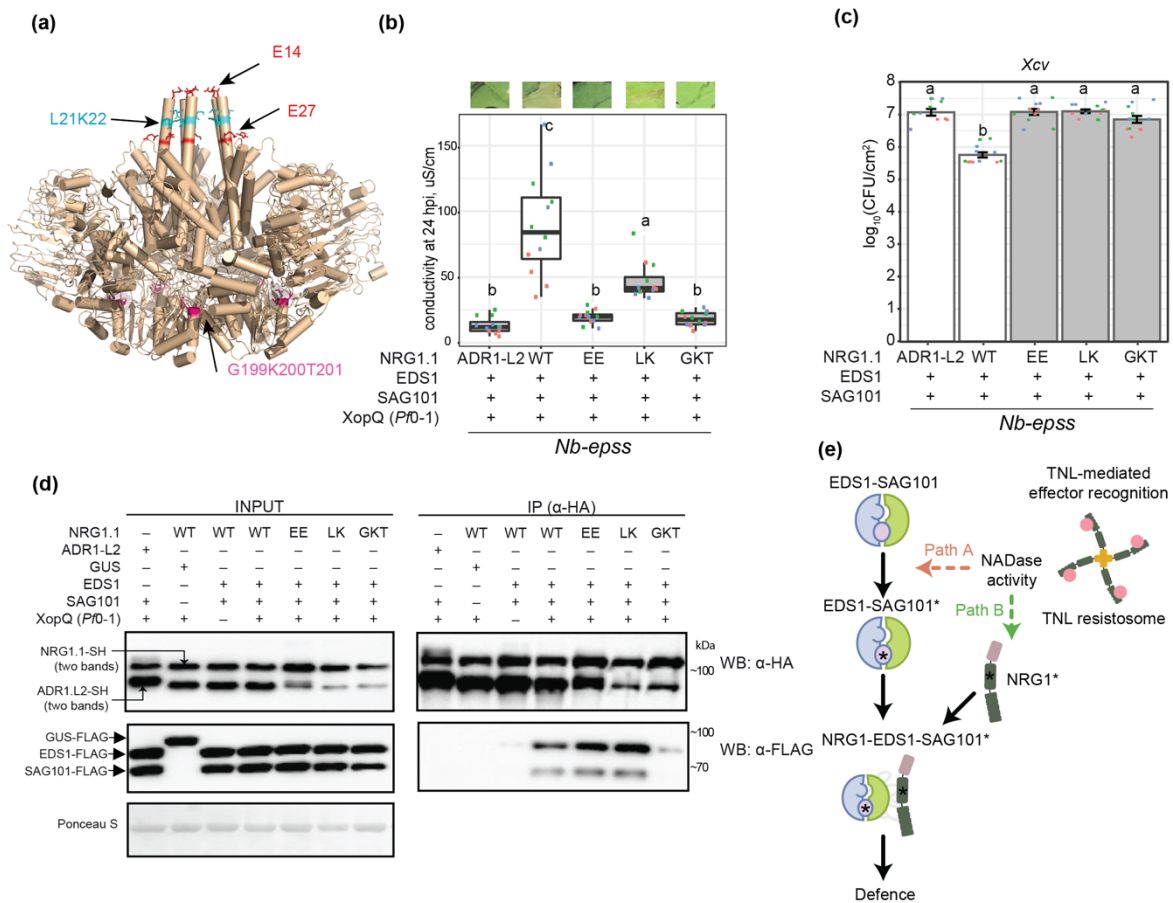

**Fig. 6. Association between *Arabidopsis* NRG1.1, EDS1 and SAG101 requires an intact NRG1.1 P-loop.** (a) A structure homology model of *Arabidopsis* NRG1.1 based on the ZAR1 resistosome (PDB: 6J5T, chains G-O). NRG1.1 amino acids E14 and E27 (red sticks) and L21 and K22 (blue sticks) are predicted to align with functionally defined residues E11, E18, F9, L10 and L14 in the N-terminal ZAR1  $\alpha$ -helix. The modelled NRG1.1 P-loop motif (G199 K200 T201) is shown as cyan sticks. *Pf0-1* XopQ-triggered cell death (b) and bacterial (*Xcv*) growth restriction (c) in *Nb-epss* expressing *Arabidopsis* NRG1.1-SH wildtype, NRG1.1<sup>E14A/E27A</sup>, NRG1.1<sup>L21A/K22A</sup> and NRG1.1<sup>G199A/K200A/T201A</sup> variants together with EDS1-FLAG and SAG101-FLAG. *Arabidopsis* proteins were expressed via *Agrobacteria*-mediated transient expression assays 2 d before *Pf0-1* XopQ (OD<sub>600</sub>=0.3) or simultaneously with *Xcv* (OD<sub>600</sub>=0.0005) infiltration. An intact NRG1.1 predicted N-terminal  $\alpha$ -helix and P-loop are required for NRG1.1 function in reconstituted ETI<sup>Roq1</sup> cell death and pathogen resistance. Experiments were performed three times independently, each with four technical replicates (leaf discs) (Tukey's HSD,  $\alpha=0.001$ ,  $n=12$ ). (d) IP and Western blot analyses testing associations of *Arabidopsis* NRG1.1 mutant variants with EDS1 and SAG101 in *Nb-epss* after triggering Roq1 signalling by *Pf0-1* XopQ infiltration (OD<sub>600</sub>=0.3; 10 hpi). *Arabidopsis* EDS1-FLAG, SAG101-FLAG with NRG1.1-SH, and using GUS-FLAG and *Arabidopsis* ADR1-L2-SH as negative controls, were expressed using *Agrobacteria* 2 d prior to *Pf0-1* XopQ infiltration. After  $\alpha$ -HA IP, the indicated fractions were analyzed with  $\alpha$ -HA and  $\alpha$ -FLAG antibodies by Western blotting. An NRG1.1 intact P-loop but not N-terminal amino acids are essential for Roq1/XopQ-dependent NRG1.1 association with the EDS1-SAG101 dimer. The experiment was repeated three times independently with similar results. (e) Model of molecular events leading to generation of an *Arabidopsis* EDS1-SAG101-NRG1 signalling complex that is essential for TNL receptor activated defence. NRG1-EDS1-SAG101 association is dependent on TNL-effector activation and requires an intact EDS1-SAG101 heterodimer EP domain cavity (purple circle) and NRG1 nucleotide binding domain P-loop motif. In two depicted scenarios, an effector-induced TNL oligomer with NADase activity leads to activation (asterisks) of EDS1-SAG101 via the EP domain cavity ('Path A', asterisk inside the purple circle) or NRG1 ('Path B'). These paths are not mutually exclusive. EDS1-SAG101-NRG1 assembly precedes and is necessary for TNL triggered cell death and resistance involving a predicted NRG1 N-terminal HeLo domain  $\alpha$ -helix.

366

367

368 We made amino acid exchanges to alanines in the NRG1.1 predicted  $\alpha$ 1-helix E11/E27  
369 (denoted EE) and L21/L22 (LK) pairs and a non-functional NRG1.1 G<sup>199</sup>K<sup>200</sup>T<sup>201</sup>/AAA P-loop  
370 variant (denoted GKT). When co-expressed with *Arabidopsis* EDS1 and SAG101 in the *Nb-*  
371 *epss* TNL<sup>Roq1</sup> assay, NRG1.1<sup>EE</sup> and NRG1.1<sup>GKT</sup> variants were non-functional and NRG1.1<sup>LK</sup>  
372 was partially functional in eliciting host cell death (Fig. 6b). All mutant NRG1.1-HA variants  
373 failed to confer *Xcv* resistance (Fig. 6c). The NRG1.1-HA variants were detected on  
374 immunoblots, as were co-expressed EDS1-FLAG and SAG101-FLAG proteins (Fig. 6d; left  
375 panel). In NRG1.1  $\alpha$ -HA IP assays, the NRG1.1-HA N-terminal EE and LK mutants  
376 immunoprecipitated EDS1-FLAG and SAG101-FLAG as efficiently as wild-type NRG1.1-SH  
377 (Fig. 6d; right panel). By contrast, the NRG1.1 P-loop GKT mutant displayed a much weaker  
378 association with EDS1 and SAG101 (Fig. 6d; right panel). Failure of NRG1.1<sup>GKT</sup> to interact  
379 with EDS1 and SAG101 indicates a requirement for ADP/ATP binding and/or nucleotide  
380 exchange at the NRG1.1 nucleotide binding domain for TNL induced association with EDS1-  
381 SAG101 and immunity. Retention of NRG1.1<sup>EE</sup> and NRG1.1<sup>LK</sup> TNL induced association with  
382 EDS1-SAG101, but their loss of immunity activity, suggests that an intact NRG1.1 N-terminal  
383 putative  $\alpha$ -helix is required for NRG1 signalling in TNL ETI as part of or after TNL-induced  
384 association with EDS1-SAG101.

385

## 386 Discussion

387 Plant intracellular NLR receptors, activated directly or indirectly by pathogen effectors, provide  
388 a critical surveillance mechanism against disease. Activated forms of the two major sensor  
389 NLR classes, TNLs and CNLs, assemble into oligomers that are required for immunity  
390 signalling and broadly resemble mammalian NLR inflammasome scaffolds<sup>7, 8, 9, 56</sup>. Two  
391 phylogenetically related groups of HeLo domain helper NLRs (NRG1s and ADR1s) and the  
392 EDS1 family of plant-specific lipase-like proteins (EDS1, PAD4 and SAG101) mediate  
393 signalling downstream of sensor NLRs, leading to transcriptional defences and localised host  
394 cell death<sup>19, 25, 26, 28, 35</sup>.

395 Here we provide genetic and molecular evidence in *Arabidopsis* that distinct RNL immunity  
396 modules (or branches) operate with specific EDS1 family heterodimers. The two modules  
397 contribute in different ways to TNL<sup>RRS1-RPS4</sup> and CNL<sup>RPS2</sup> ETI, and to basal immunity against  
398 virulent bacteria (Fig. 1 and 2; Supplementary Fig. 1-3). We show in *Arabidopsis* and *N.*  
399 *benthamiana* that TNL-effector activation induces a specific association between NRG1  
400 proteins and EDS1-SAG101 heterodimers (Fig. 3 and 4). In *N. benthamiana* TNL ETI  
401 reconstitution assays, interactions of NRG1 with EDS1 and SAG101 and effective TNL  
402 immunity signalling require a functional EDS1 EP domain within the EDS1-SAG101

403 heterodimer and an intact P-loop motif in NRG1 for nucleotide binding (Fig. 5 and 6).  
404 Conserved amino acids at the NRG1 N-terminus, modelled onto the structure of a CNL  
405 receptor (ZAR1) membrane pore-forming  $\alpha$ 1-helix<sup>7</sup>, are important for TNL ETI but not for TNL-  
406 induced NRG1 association with EDS1-SAG101 (Fig. 6). Our data provide a first molecular  
407 underpinning for genetically separate RNL-EDS1 mechanisms conferring immunity and cell  
408 death downstream of NLR-mediated effector recognition (Fig. 1 and 2; <sup>25, 26, 28</sup>). The data  
409 further demonstrate that sensor NLR-induced assembly of helper NLRs with EDS1 family  
410 proteins is a critical step for TNL downstream signalling.

411 Previous studies in *Arabidopsis* revealed unequal genetic and transcriptional contributions  
412 (unequal redundancy) of *PAD4* vs. *SAG101*<sup>19, 25, 26, 31</sup> and *ADR1* vs. *NRG1* groups in ETI and  
413 basal immunity responses to pathogens<sup>12, 26</sup>. *Arabidopsis* *SAG101* and *NRG1*s function in  
414 ETI mediated by TNL receptors and are drivers of TNL host cell death and transcriptional  
415 reprogramming<sup>12, 26, 27</sup>. *PAD4* and *ADR1*s are recruited more broadly for TNL and CNL ETI  
416 immune responses, in which they control transcriptional SA-dependent and SA-independent  
417 defence pathways<sup>22, 28, 32, 33</sup>. Our analysis of *Arabidopsis* *pad4*, *sag101*, *adr1*- and *nrg1*-group  
418 combinatorial mutants shows that individual components of the two immunity modules are not  
419 interchangeable in TNL<sup>RRS1-RPS4</sup> or CNL<sup>RPS2</sup> immune responses. These data reveal a specificity  
420 in module composition and function (Fig. 1, Supplementary Fig. 1).

421 Removal of the *ICS1* dependent SA pathway uncovered the extent to which separate *PAD4*-  
422 *ADR1*s and *SAG101*-*NRG1*s genetic mechanisms are preserved (Fig. 2 and Supplementary  
423 Fig. 2). The SA pathway is bolstered in *Arabidopsis* by *PAD4* and *ADR1*s via a mutually  
424 reinforcing feedback loop<sup>22, 33, 41, 57</sup>. Notably, the removal of *ICS1* and *SAG101* together,  
425 released a *PAD4*-*ADR1*s activity leading to host cell death in TNL<sup>RRS1-RPS4</sup> immunity (Fig. 2b,  
426 c). Hence, each TNL signalling branch has a transcriptional reprogramming and cell death-  
427 inducing capacity, depending on the status of other pathways in the network<sup>5, 58, 59</sup>. *SAG101*-  
428 *NRG1*s and SA antagonism of *PAD4*-*ADR1*s stimulated cell death suggests there is crosstalk  
429 between the different sectors, possibly to limit host tissue damage and promote systemic relay  
430 of immunity signals<sup>28</sup>. Although metacaspase 1 (MC1) controlled proteolysis promoting RPM1  
431 cell death is also conditionally antagonized by SA<sup>39</sup>, we did not detect a role for *MC1* in  
432 *SAG101*-*NRG1*s or *PAD4*-*ADR1*s stimulated TNL<sup>RRS1-RPS4</sup> triggered cell death  
433 (Supplementary Fig. 3).

434 *Arabidopsis* IP-LC-MS analyses using EDS1, SAG101, PAD4 and NRG1.2 individually as  
435 baits were performed in TNL<sup>RRS1-RPS4</sup> triggered leaf tissues between 4 and 8 h after bacterial  
436 infiltration, based on knowledge of a critical 4-8 h time window needed for EDS1-PAD4 and  
437 *ADR1*s mobilized gene expression to be effective in immunity<sup>12, 13, 32, 43, 49</sup>. Also, *Arabidopsis*

438 TNL<sup>RRS1-RPS4</sup> triggered *SAG101-NRG1s*-dependent cell death started to increase from 6-8 hpi  
439 with *Pf0-1 avrRps4* (Fig. 1 and 2; Supplementary Fig. 1; <sup>26</sup>). The sum of IP-MS data (Fig. 3)  
440 point to molecular specificity in EDS1-SAG101 association with NRG1.1 and NRG1.2  
441 functional isoforms, and in EDS1-PAD4 association with ADR1-L1 and ADR-L2 isoforms, in  
442 TNL receptor induced cells. The absence of a detectable association between NRG1.2 with  
443 EDS1 or SAG101 at 4 h after *Pf0-1* EV treatment (Fig. 3d), shows that PTI alone is insufficient  
444 to induce NRG1s associations with EDS1 or SAG101. These data imply that NRG1.2  
445 association with EDS1 and SAG101 requires an activated TNL-derived signal. We suggest it  
446 is likely that an EDS1-SAG101-NRG1 functional interaction is principally a post-transcriptional  
447 event because (i) it was detected in *Arabidopsis* at 4 hpi (Fig. 3d, e) before the main *EDS1*-  
448 dependent transcriptional elevation at 8-10 hpi <sup>12, 32, 49</sup> and (ii) it could be recapitulated in *N.*  
449 *benthamiana* with abundant transiently expressed proteins only after an effector-TNL trigger  
450 (Fig. 4c).

451 Interestingly, a signalling inactive truncated NRG1.3 isoform <sup>25</sup> was enriched with both  
452 SAG101 and to a lesser extent with PAD4 (Fig. 3a). This might reflect an NRG1.3 role in  
453 negative regulation of both modules. It is also possible that NRG1 determinants for preferential  
454 association with EDS1-SAG101 lie in the NRG1 C-terminal portion. Weak association  
455 detected between PAD4 and NRG1.1 (Fig. 5d) also deviates from otherwise clear-cut specific  
456 associations of within-module components (Fig. 3a). However, these associations are unlikely  
457 to contribute to *Arabidopsis* TNL immune signalling (Fig. 1; <sup>26</sup>).

458 We interrogated the molecular requirements for *Arabidopsis* EDS1 and SAG101 functional  
459 association with NRG1.1 in *Nb-epss* TNL<sup>Roq1</sup> transient reconstitution assays. TNL ETI induced  
460 NRG1.1 association was only observed in IPs with EDS1 and SAG101 together (Fig 4c, 5d,  
461 6d), supporting NRG1 association with a signalling competent EDS1-SAG101 heterodimer  
462 (Fig. 3) but not with EDS1 or SAG101 individually (Fig. 5d) which are inactive <sup>30, 45, 46</sup>. A  
463 previous study proposed that NRG1 signals downstream of EDS1 in regulating TNL<sup>Roq1</sup>  
464 immunity and cell death <sup>35</sup>. Our protein interaction assays instead point to NRG1 working  
465 biochemically together with EDS1-SAG101 in the TNL<sup>Roq1</sup> immunity signalling cascade. The  
466 discrete timing of NRG1-EDS1-SAG101 association detection between 8-12 hpi suggests it is  
467 transient in nature, although it is unclear in this system whether reduced association at later  
468 time-points is a controlled event, possibly to dampen outputs, or due to cell death.

469 A requirement for EDS1 EP domain essential residues within the EDS1-SAG101 heterodimer  
470 <sup>26, 29</sup> to interact with NRG1.1 in a TNL ETI-dependent manner (Fig. 5d), suggests that an intact  
471 EDS1-SAG101 EP-domain drives its association with NRG1 downstream of TNL receptor  
472 activation, as depicted in a model (Fig. 6e). Notably, the TNL-induced NRG1-EDS1-SAG101

473 association and ETI also required a nucleotide-binding form of NRG1.1, whereas N-terminal  
474 NRG1.1 amino acids on a ZAR1-like functional N-terminal  $\alpha$ -helix, were dispensible for their  
475 association (Fig. 6d). Together, these data argue for TNL effector recognition rendering  
476 both NRG1 and EDS1-SAG101 competent to associate and confer pathogen resistance (Fig.  
477 6e). Recently, the TIR domains of plant TNLs and certain truncated TIR forms were shown to  
478 exhibit an NADase activity (shown in Fig. 6e) that is necessary to induce plant *EDS1*  
479 dependent cell death<sup>10, 11, 60</sup>. Reported cryo-EM structures of effector-activated TNLs  
480 *Arabidopsis* RPP1 and *N. benthamiana* Roq1 reveal them to be tetrameric complexes with  
481 imposed TIR domain orientations creating an active NADase enzyme<sup>8,9</sup>. Our findings suggest  
482 concerted actions between plant TNL NADase activity and immunity signalling via TNL-  
483 effector recognition induced EDS1-SAG101-NRG1 association. In our model (Fig. 6e), we  
484 envisage two paths for generating a signalling competent NRG1-EDS1-SAG101 complex. In  
485 path A, a TNL-derived NADase product binds to EDS1-SAG101, thereby enabling EP domain-  
486 dependent association with NRG1, perhaps triggering NRG1 oligomerization. In path B, the  
487 activated TNL receptor and/or NADase products cause an NRG1 nucleotide-dependent  
488 conformational change (independently of EDS1-SAG101) which promotes its association with  
489 EDS1-SAG101. The data presented here represent a significant advance by showing that  
490 pathogen-activated TNL receptors mediate downstream signalling via induced, specific  
491 interactions between TNLs and EDS1 family proteins.

492

## 493 **Methods**

### 494 Plant materials and growth conditions

495 *Arabidopsis thaliana* L. Heynh. (hereafter *Arabidopsis*) wild type, transgenic and mutant lines  
496 as well as *Nicotiana benthamiana* lines are listed in the Supplementary Table 1. For pathogen  
497 growth and cell death assays, *Arabidopsis* plants were grown under short day conditions (10  
498 h light 22°C/14 h dark 20°C, light intensity of ~100  $\mu\text{mol m}^{-2} \text{sec}^{-1}$ , 65% relative humidity) for  
499 4-5 weeks. Crosses and seed propagation were conducted under speed breeding growth  
500 conditions: 22 h light 22°C/ 2 h dark 20°C, ~100  $\mu\text{mol m}^{-2} \text{sec}^{-1}$ , 65% relative humidity. *N.*  
501 *benthamiana* plants were grown in a greenhouse under long day conditions for 5-6 weeks.

### 502 Cloning, site-directed mutagenesis and generation of complementation lines

503 Genomic Col-0 *SAG101* sequence (AT5G14930.2) including the coding and upstream (-992  
504 bp) sequences were cloned into pENTR/D-TOPO (K240020, Thermo Fisher Scientific) and  
505 further LR-inserted (11791100, Thermo Fisher Scientific) into the expression vector pXCG-  
506 mYFP<sup>61</sup> resulting in pXCG pSAG101:SAG101-YFP. pXCSG p35S:NRG1.1-StrepII-3xHA as  
507 well as the pXCSG pADR1-L2:ADR1-L2-StrepII-3xHA constructs were described previously  
508<sup>26</sup>. Constructs to express NRG1.1 mutant variants were prepared using the Golden gate  
509 MolClo kit<sup>62</sup>. The genomic sequence of Col-0 *NRG1.1* (AT5G66900.1, from start ATG codon  
510 to the last codon position) was cloned into the level 0 plasmid pAGM1287, and the *NRG1.1*  
511 variants were generated following the QuikChange II Site-Directed mutagenesis (SDM)  
512 protocol (#200555, Agilent). Level 0 golden gate compatible construct for the genomic  
513 sequence of Col-0 *EDS1* (AT3G48090.1, from the first to the last codon) was synthesized and  
514 inserted into the pAM vector (GeneArt, Thermo Fisher Scientific). *EDS1*<sup>H476Y</sup> and *EDS1*<sup>F419E</sup>  
515 mutant constructs were generated via SDM. Primers for cloning and SDM are listed in  
516 Supplementary Table 2. To obtain level 1 expression constructs, level 0 constructs of *NRG1.1*  
517 mutants were combined with the cauliflower mosaic virus (CaMV) 35S promoter (pICH51288),  
518 hemagglutinin tag (3xHA, pICSL50009), CaMV 35S terminator (pICH41414) and the  
519 backbone pICH47732. Expression vectors for *EDS1* (p35S:EDS1<sup>H476Y</sup>-3xFLAG,  
520 p35S:EDS1<sup>F419E</sup>-3xFLAG) were cloned following the same strategy except the tag module was  
521 replaced by 3xFLAG (pICSL50007). The wild type p35S:EDS1-3xFLAG was prepared by LR-  
522 recombining pENTR/D-TOPO *EDS1*\_noStop (genomic sequence of AT3G48090.1 from ATG  
523 to the last codon<sup>30</sup> with pAMPAT-3xFLAG<sup>61</sup>. p35S:PAD4-3xFLAG expression construct is a  
524 result of a LR reaction between pENTR/D-TOPO PAD4<sup>30</sup> and pAMPAT-3xFLAG.  
525 p35S:3xFLAG-GUS was prepared by LR-recombining pJ2B-3xFLAG<sup>61</sup> with pENTR GUS  
526 (from LR clonase II kit, 11791020, Thermo Fisher Scientific). To prepare the *PAD4* expression  
527 construct for complementation, we PCR-amplified the *PAD4* locus (AT3G52430.1) from the  
528 upstream gene's stop codon (AT3G52420) up to the start codon of the downstream gene  
529 (AT3G52440) and placed it in a pDONR201 vector via PIPE-PCR<sup>63</sup>. Subsequently, N-terminal  
530 YFP with a linker peptide (Gly followed by 9x Ala) was introduced via PIPE-PCR as well. This  
531 construct was LR-recombined in a pAlligator2 destination vector<sup>64</sup>. Level 1 golden gate and  
532 gateway expression constructs were transformed via electroporation into *Rhizobium*  
533 *radiobacter* (hereafter *Agrobacterium tumefaciens* or *Agrobacteria*) GV3101 pMP90RK or  
534 pMP90 for transient expression in *N. benthamiana* and stable expression in *Arabidopsis*  
535 (Supplementary Table 3). We transformed pXCG pSAG101:SAG101-YFP and pAlligator2  
536 pPAD4:YFP-Linker-PAD4 into *Arabidopsis pad4-1 sag101-3* mutant and selected  
537 homozygous complementation lines using BASTA resistance or the GFP seed coat  
538 fluorescence markers, respectively.

### 539 *Pseudomonas* growth and cell death assays in *Arabidopsis*



540 *Pseudomonas syringae* pv. *tomato* (*Pst*) DC3000 with the empty vector pVSP61, pVSP61  
541 avrRps4 or pVSP61 avrRpt2 were syringe-infiltrated into Arabidopsis leaves at OD<sub>600</sub>=0.0005  
542 in 10 mM MgCl<sub>2</sub>. Leaf discs were harvested at 0 dpi (four leaf discs as four technical replicates)  
543 and 3 dpi (12 leaf discs divided over four technical replicates). Biological replicates are  
544 experiments performed on different days with the same or different batches of plants. For cell  
545 death assays, *Pseudomonas fluorescens* effector tester strain Pf0-1 avrRps4<sup>48</sup> was  
546 resuspended in 10 mM MgCl<sub>2</sub> (OD<sub>600</sub>=0.2) and syringe-infiltrated into leaves. Eight leaves per  
547 genotype were infiltrated for each biological replicate (experiments performed on different  
548 days with the same or different batches of plants). Conductivity of solution with the incubated  
549 leaf discs was measured at 6, 8, 10, and 24 hpi as described earlier<sup>26</sup>. Macroscopic cell death  
550 phenotype was recorded at 24 hpi. For cell death assays with *Pst* avrRpt2, bacteria were  
551 resuspended 10 mM MgCl<sub>2</sub> to OD<sub>600</sub>=0.02 and electrolyte leakage was measured as  
552 described for Pf0-1 avrRps4 triggered cell death. Means of three biological replicates  
553 (experiments performed on different days, four technical replicates each, n=12) were used to  
554 prepare heatmap with the pheatmap package in R. The statistical analysis included checking  
555 normality of residuals distribution (Shapiro-Wilcoxon at  $\alpha=0.05$  or visually with qq-plot) and  
556 homoscedasticity (Levene test at  $\alpha=0.05$ ). Difference in means was assessed via Tukey's  
557 HSD test ( $\alpha=0.001$ , experiment taken as a factor in ANOVA).

#### 558 Reconstitution of Roq1 cell death and resistance assays in *N. benthamiana*

559 *Roq1* cell death reconstitution assays were performed with the Pf0-1 XopQ<sup>65</sup> strain in *N.*  
560 *benthamiana* quadruple mutant *eds1a pad4 sag101a sag101b (Nb-epss)*<sup>26</sup>. *Agrobacteria*  
561 induced for one hour in Agromix (10 mM MgCl<sub>2</sub>, 10 mM MES pH5.6, 150  $\mu$ M acetosyringone)  
562 were firstly syringe-infiltrated at OD<sub>600</sub>=0.2 into *Nb-epss* leaves. At 48hpi, Pf0-1 XopQ or Pf0-  
563 1 (empty vector) were infiltrated at OD<sub>600</sub>=0.3 in the same leaf zone. At 24 hours after Pf0-1  
564 XopQ infiltration, macroscopic cell death phenotype was recorded and four leaf discs (as four  
565 technical replicates) were taken for measuring electrolyte leakage at 6 h after collecting the  
566 leaf discs. *Xanthomonas campestris* pv. *vesicatoria* (*Xcv* 85-10; also *Xanthomonas*  
567 *euvesicatoria*) growth assays in *epss* in the presence of *Agrobacteria* to express proteins of  
568 interest were performed as described earlier<sup>26</sup>.

#### 569 Co-immunoprecipitation (co-IP) and immunoblotting analyses

570 In co-IP assays with proteins expressed in *N. benthamiana* *Roq1* reconstitution assays, five  
571 10 mm leaf discs were collected to form a sample. Total protein from the plant material ground  
572 to fine powder was extracted in 2 ml of the extraction buffer (10% glycerol, 100 mM Tris-HCl  
573 pH7.5, 5 mM MgCl<sub>2</sub>, 300 mM NaCl, 10 mM DTT, 0.5% NP-40, 2% PVPP, 1x Plant protease  
574 cocktail (11873580001, MilliporeSigma)). Lysates were centrifuged for 35 min at 4,500 x g  
575 and filtered through two layers of Miracloth (475855, MilliporeSigma). The 50  $\mu$ l aliquots of the  
576 filtered supernatant were taken as input samples. Co-IP were conducted for 2 h with 12  $\mu$ l  $\alpha$ -  
577 HA affinity matrix (11815016001, MilliporeSigma) under constant rotation. Beads were  
578 collected by centrifugation at 4,000 x g for 1 min and washed four times in extraction buffer  
579 (without DTT and PVPP). All co-IP steps were conducted at 4°C. Beads and input samples  
580 were boiled at 95°C in 100  $\mu$ l 2xLaemmli buffer for 10 min. Antibodies used for immunoblotting  
581 were  $\alpha$ -GFP (11814460001, MilliporeSigma),  $\alpha$ -HA (1:5000; c29f4, Cell Signalling),  $\alpha$ -FLAG  
582 (1:5000; f1804, MilliporeSigma). Antibodies were used in dilution 1:5000 (TBST with 3% non-  
583 fat milk powder).

#### 584 Immunoprecipitation (IP) of EDS1-YFP and TRB1-GFP from Arabidopsis complementation 585 lines

586 Nuclei-enriched fractions were isolated from ~20 g of leaves of 4-5 week-old plants grown  
587 under short day conditions described above and vacuum-infiltrated with *Pst avrRps4*  
588 (OD<sub>600</sub>=0.1, 10 mM MgCl<sub>2</sub> supplemented with 0.005% Silwet-L77). Samples were collected at  
589 8-10 hours after the infiltration. After sample collection, all steps were conducted at 4°C or on  
590 ice. Extraction was performed mainly as in <sup>66</sup> with modifications. Leaves were chopped with a  
591 razor blade, all buffers contained 2xPlant Protease inhibitor cocktail (11873580001,  
592 MilliporeSigma). Separation was performed only on one Percoll gradient (80%-30%) followed  
593 by a final clean up through the 30% Percoll layer. Nuclei-enriched fractions were spun down  
594 for 10 min at 1,000 g to remove Percoll and hexylene glycol.

595 Nuclei-enriched fraction was gently resuspended in 1 ml of the sample buffer (20 mM Tris-HCl  
596 pH7.4, 2 mM MgCl<sub>2</sub>, 150 mM NaCl, 5% glycerol, 5 mM DTT, EDTA-free protease inhibitor  
597 (11873580001, MilliporeSigma)), centrifuged for 10 min at 1,000 g, and carefully resuspended  
598 again in 600 µl of the sample buffer. After incubation of washed nuclei at 37°C with 10 units  
599 of DNase I (89836, Thermo Fisher Scientific) and 20 µg of RNase A (EN0531, Thermo Fisher  
600 Scientific) under soft agitation for 15 min, samples were placed on ice for 10 min and sonicated  
601 for 6 cycles 15 sec “on” – 15 sec “off” using Bioruptor Plus (Diagenode). After that, samples  
602 were centrifuged for 15 min at 16,000 x g, and the supernatant was used as input for IP with  
603 GFP-trap A beads (per IP, 25 µl of slurry prewashed in 2 ml of the samples buffer, gta-100  
604 (Proteintech)). Before IP, 25 µl of the supernatant is set aside as an input fraction for quality  
605 controls. Then, samples were supplemented with 10% Triton X-100 to the final concentration  
606 0.1% and 0.5 M EDTA to the final concentration of 2 mM. After 2.5 hours of incubation with  
607 the sample in Protein Lobind tubes (0030108116 and 0030108132, Eppendorf), beads were  
608 washed four times in 300 µl 3 min each in the wash buffer (20 mM Tris-HCl pH7.4, 150 mM  
609 NaCl, 2 mM EDTA). Proteins were eluted in 2x35 µl 0.1% TFA and neutralized in 90 µl of Tris-  
610 Urea (4M urea 50mM Tris-HCl pH 8.5).

#### 611 Gel filtration chromatography

612 Nuclear extracts (600 µl) from the *pEDS1:EDS1-YFP* complementation line were processed  
613 as for IP input in the subsection “Immunoprecipitation (IP) of EDS1-YFP and TRB1-GFP from  
614 respective Arabidopsis complementation lines”. Obtained samples were fractionated on the  
615 column Superose 6 10/300 GL (50 kDa - 5 MDa range, GE Healthcare Life Sciences, Äkta  
616 FPLC) at the rate 0.5 ml/min in 20 mM Tris-HCl pH7.4 and 150 mM NaCl. The temperature  
617 was kept at 4°C. In total, 28 0.5 ml fractions per sample were collected, concentrated with  
618 StrataClean resin (400714, Agilent) and analyzed using Western blot method (α-GFP,  
619 11814460001, MilliporeSigma) with the same total EDS1-YFP sample on each blot for the  
620 between-blot normalization. High-molecular weight marker was run prior each experiment  
621 (28403842, GE Healthcare Life Sciences).

#### 622 IPs of YFP-PAD4 and SAG101-YFP from Arabidopsis complementation lines

623 Five-week-old Arabidopsis plants containing p35S:StrepII-3xHA-YFP (Col-0), pPAD4:YFP-  
624 PAD4 (*pad4-1 sag101-3* background) or pSAG101:SAG101-YFP (*pad4-1 sag101-3*) were  
625 vacuum infiltrated with *Pf0-1 avrRps4* bacteria (OD=0.2 in 10 mM MgCl<sub>2</sub> with 0.01% Silwet L-  
626 70). ~2 gram of rosette material was collected at 6 hpi, snap-frozen in liquid nitrogen and kept  
627 at -80°C until IP. On the day of IP, samples from were ground to fine powder in Precellys 15  
628 ml tubes (P000946-LYSK0-A, Bertin Instruments). The protein extraction was performed in  
629 the 10 ml of the buffer composed of 20 mM PIPES-KOH pH7.0, 150 mM NaCl, 10 mM MgCl<sub>2</sub>,  
630 10% glycerol (v/v), 5 mM DTT, 1% Triton X-100, Plant Protease Inhibitor cocktail  
631 (11873580001, MilliporeSigma). The protein extraction was performed at 4°C for 20 min under  
632 constant end-to-end mixing (~60 rpm). After that, the samples were cleared by centrifuging 20  
633 min at 4°C 3,000 x g. The supernatant was passed once through 0.2 µm filters (KC64.1, Roth)

634 to remove debris. Each sample (10 ml in 15 ml Falcon tubes) was incubated for 2.5 hours at  
635 4°C under constant end-to-end mixing (~20 rpm) with equilibrated beads corresponding to 20  
636 µl of GFP-trapA (*gta100*, Proteintech) slurry. After the incubation, beads were washed three  
637 times 5 min each with the wash buffer containing 20 mM Tris-HCl pH7.4, 150 mM NaCl, 0.01%  
638 Triton X-100, Plant Protease Inhibitor cocktail (11873580001, MilliporeSigma). Finally, to  
639 remove Triton X-100 traces, the beads were washed two additional times 1 min each in the  
640 buffer with 20 mM Tris-HCl pH7.4 and 150 mM NaCl.

#### 641 Purification of NRG1.2 from the Arabidopsis complementation line

642 Arabidopsis *Ws-2 nrg1a nrg1b* complementation line from <sup>19</sup> was grown in short-day  
643 conditions for 5-6 weeks. *Pf0-1* empty vector or *Pf0-1 avrRps4* were resuspended in the  
644 infiltration buffer (10 mM MES pH 5.7, 10 mM MgCl<sub>2</sub>) at OD<sub>600</sub>=0.3 and syringe-infiltrated into  
645 apoplastic space of rosette leaves. Approximately 2.5 g of tissue was harvested 4 hpi and  
646 flash frozen. Tissue was ground in liquid nitrogen before lysis in 100 mM HEPES (pH 7.5),  
647 300 mM NaCl, 5 mM MgCl<sub>2</sub>, 0.5% Nonidet P-40, 10 mM DTT, 10% glycerol, and cComplete™  
648 EDTA-free Protease Inhibitor Cocktail (11873580001, MilliporeSigma). Lysate was  
649 centrifuged at 4,000 g for 35 min at 4 °C and filtered through Miracloth to pellet and remove  
650 debris. Lysate was incubated with buffer equilibrated ANTI-FLAG® M2 Affinity Agarose beads  
651 (A2220, MilliporeSigma) for 45 min. Beads were washed before incubation with 3XFLAG®  
652 Peptide (F4799, Sigma-Aldrich) for 2 hrs. Eluate was collected for further analysis by  
653 immunoblot and mass spectroscopy.

#### 654 Immunoblot analysis of NRG1.2-EDS1 interactions in Arabidopsis

655 Samples were heated in 4X SDS Sample Loading Buffer (10 mM DTT) at 65 °C for 5 min.  
656 Proteins were resolved on 4-20% SDS-PAGE (4561095, Bio-Rad) and dry transferred by  
657 Trans-Blot Turbo Transfer System to PVDF membrane (170427, Bio-Rad). Membranes were  
658 blocked in 5% milk (v/w) in TBST for 1 hr. For protein detection, HRP-conjugated anti-FLAG  
659 (A-8592, Sigma-Aldrich) was used at 1:30,000 (TBST, 5% milk powder [v/w]) and anti-EDS1  
660 (AS13 2751, Agrisera) was used at 1:3000 (TBST, 3% milk powder [v/w]) and probed  
661 overnight at 4°C. Membranes were washed three times in TBS-T for 10 min. Secondary HRP-  
662 conjugated antibody (A0545, MilliporeSigma) was used at 1:10,000 (TBST, 5% milk powder  
663 [v/w]) at RT for 2 hrs. Membranes were washed three times in TBST for 10 min, and three  
664 times in TBS for 5 min. Detection of signal was performed with enhanced chemiluminescent  
665 horseradish peroxidase substrates SuperSignal™ West Pico PLUS (34580, Thermo Fischer  
666 Scientific) and Femto (34095, Thermo Fischer Scientific), and ImageQuant LAS 4000™ for  
667 protein band visualisation.

#### 668 Arabidopsis NRG1.1 structure homology modelling

669 NRG1.1 (AT5G66900.1) was modelled on ZAR1 resistosome cryo-electron microscopy  
670 structure (PDB: 6j5tc1) using SWISS-MODEL. Visualization was performed in Pymol  
671 (Schrödinger, LLC).

672

673 **List of Supplementary materials**

674 Supplementary Table 1. Plant genetic materials used in this study

675 Supplementary Table 2. Oligonucleotide sequences used in this study

676 Supplementary Table 3. *Agrobacteria* strains used in this study

677 Supplementary Text. Methods specific to LC-MS analyses presented in the study

678

679 **References**

680 1. Jones JDG, Vance RE, Dangl JL. Intracellular innate immune surveillance devices in  
681 plants and animals. *Science (New York, NY)* **354**, aaf6395 (2016).

682

683 2. Tamborski J, Krasileva KV. Evolution of Plant NLRs: From Natural History to Precise  
684 Modifications. *Annual review of plant biology* **71**, 355-378 (2020).

685

686 3. Wang J, Chai J. Molecular actions of NLR immune receptors in plants and animals.  
687 *Science China Life Sciences* **63**, 1-14 (2020).

688

689 4. Monteiro F, Nishimura MT. Structural, Functional, and Genomic Diversity of Plant NLR  
690 Proteins: An Evolved Resource for Rational Engineering of Plant Immunity. *Annual*  
691 *Review of Phytopathology* **56**, 243-267 (2018).

692

693 5. Cui H, Tsuda K, Parker JE. Effector-triggered immunity: from pathogen perception to  
694 robust defense. *Annual review of plant biology* **66**, 487-511 (2015).

695

696 6. Saur IML, Panstruga R, Schulze-Lefert P. NOD-like receptor-mediated plant immunity:  
697 from structure to cell death. *Nature Reviews Immunology*, (2020).

698

699 7. Wang J, *et al.* Reconstitution and structure of a plant NLR resistosome conferring  
700 immunity. *Science (New York, NY)* **364**, (2019).

701

702 8. Ma S, *et al.* Direct pathogen-induced assembly of an NLR immune receptor complex  
703 to form a holoenzyme. *Science (New York, NY)* **370**, eabe3069 (2020).

704

705 9. Martin R, *et al.* Structure of the activated ROQ1 resistosome directly recognizing the  
706 pathogen effector XopQ. *Science (New York, NY)* **370**, eabd9993 (2020).

707

708 10. Horsefield S, *et al.* NAD(+) cleavage activity by animal and plant TIR domains in cell  
709 death pathways. *Science (New York, NY)* **365**, 793-799 (2019).

710

711 11. Wan L, *et al.* TIR domains of plant immune receptors are NAD(+)-cleaving enzymes  
712 that promote cell death. *Science (New York, NY)* **365**, 799-803 (2019).

713

714 12. Saile SC, *et al.* Two unequally redundant "helper" immune receptor families mediate  
715 *Arabidopsis thaliana* intracellular "sensor" immune receptor functions. *PLoS biology*  
716 **18**, e3000783 (2020).

717

718 13. Mine A, Seyfferth C, Kracher B, Berens ML, Becker D, Tsuda K. The Defense  
719 Phytohormone Signaling Network Enables Rapid, High-Amplitude Transcriptional  
720 Reprogramming during Effector-Triggered Immunity. *The Plant cell* **30**, 1199-1219  
721 (2018).

722

- 723 14. Bartsch M, *et al.* Salicylic acid-independent ENHANCED DISEASE  
724 SUSCEPTIBILITY1 signaling in Arabidopsis immunity and cell death is regulated by  
725 the monooxygenase FMO1 and the Nudix hydrolase NUDT7. *The Plant cell* **18**, 1038-  
726 1051 (2006).  
727
- 728 15. Ngou BPM, Ahn H-K, Ding P, Jones JD. Mutual Potentiation of Plant Immunity by Cell-  
729 surface and Intracellular Receptors. 2020.2004.2010.034173 (2020).  
730
- 731 16. Yuan M, *et al.* Pattern-recognition receptors are required for NLR-mediated plant  
732 immunity. *bioRxiv*, 2020.2004.2010.031294 (2020).  
733
- 734 17. Jubic LM, Saile S, Furzer OJ, El Kasmi F, Dangl JL. Help wanted: helper NLRs and  
735 plant immune responses. *Current opinion in plant biology* **50**, 82-94 (2019).  
736
- 737 18. Wu C-H, *et al.* NLR network mediates immunity to diverse plant pathogens.  
738 *Proceedings of the National Academy of Sciences* **114**, 8113 (2017).  
739
- 740 19. Castel B, *et al.* Diverse NLR immune receptors activate defence via the RPW8-NLR  
741 NRG1. *The New phytologist* **222**, 966-980 (2019).  
742
- 743 20. Peart JR, Mestre P, Lu R, Malcuit I, Baulcombe DC. NRG1, a CC-NB-LRR Protein,  
744 together with N, a TIR-NB-LRR Protein, Mediates Resistance against Tobacco Mosaic  
745 Virus. *Current Biology* **15**, 968-973 (2005).  
746
- 747 21. Collier SM, Hamel L-P, Moffett P. Cell Death Mediated by the N-Terminal Domains of  
748 a Unique and Highly Conserved Class of NB-LRR Protein. *Molecular Plant-Microbe*  
749 *Interactions*® **24**, 918-931 (2011).  
750
- 751 22. Bonardi V, Tang S, Stallmann A, Roberts M, Cherkis K, Dangl JL. Expanded functions  
752 for a family of plant intracellular immune receptors beyond specific recognition of  
753 pathogen effectors. *Proceedings of the National Academy of Sciences of the United*  
754 *States of America* **108**, 16463-16468 (2011).  
755
- 756 23. Daskalov A, *et al.* Identification of a novel cell death-inducing domain reveals that  
757 fungal amyloid-controlled programmed cell death is related to necroptosis.  
758 *Proceedings of the National Academy of Sciences of the United States of America*  
759 **113**, 2720-2725 (2016).  
760
- 761 24. Mahdi LK, *et al.* Discovery of a Family of Mixed Lineage Kinase Domain-like Proteins  
762 in Plants and Their Role in Innate Immune Signaling. *Cell host & microbe* **28**, 813-824  
763 (2020).  
764
- 765 25. Wu Z, *et al.* Differential regulation of TNL-mediated immune signaling by redundant  
766 helper CNLs. *The New phytologist* **222**, 938-953 (2019).  
767
- 768 26. Lapin D, *et al.* A Coevolved EDS1-SAG101-NRG1 Module Mediates Cell Death  
769 Signaling by TIR-Domain Immune Receptors. *The Plant cell* **31**, 2430-2455 (2019).  
770
- 771 27. Wiermer M, Feys BJ, Parker JE. Plant immunity: the EDS1 regulatory node. *Current*  
772 *opinion in plant biology* **8**, 383-389 (2005).  
773
- 774 28. Lapin D, Bhandari DD, Parker JE. Origins and Immunity Networking Functions of  
775 EDS1 Family Proteins. *Annual Review of Phytopathology* **58**, 253-276 (2020).  
776

- 777 29. Gantner J, Ordon J, Kretschmer C, Guerois R, Stuttmann J. An EDS1-SAG101  
778 Complex Is Essential for TNL-Mediated Immunity in *Nicotiana benthamiana*. *The Plant*  
779 *cell* **31**, 2456-2474 (2019).  
780
- 781 30. Wagner S, *et al.* Structural basis for signaling by exclusive EDS1 heteromeric  
782 complexes with SAG101 or PAD4 in plant innate immunity. *Cell host & microbe* **14**,  
783 619-630 (2013).  
784
- 785 31. Rietz S, *et al.* Different roles of Enhanced Disease Susceptibility1 (EDS1) bound to  
786 and dissociated from Phytoalexin Deficient4 (PAD4) in Arabidopsis immunity. *The New*  
787 *phytologist* **191**, 107-119 (2011).  
788
- 789 32. Bhandari DD, *et al.* An EDS1 heterodimer signalling surface enforces timely  
790 reprogramming of immunity genes in Arabidopsis. *Nature communications* **10**, 772  
791 (2019).  
792
- 793 33. Cui H, Gobbato E, Kracher B, Qiu J, Bautor J, Parker JE. A core function of EDS1 with  
794 PAD4 is to protect the salicylic acid defense sector in Arabidopsis immunity. *The New*  
795 *phytologist* **213**, 1802-1817 (2017).  
796
- 797 34. Tanaka S, Han X, Kahmann R. Microbial effectors target multiple steps in the salicylic  
798 acid production and signaling pathway. *Frontiers in Plant Science* **6**, 349 (2015).  
799
- 800 35. Qi T, *et al.* NRG1 functions downstream of EDS1 to regulate TIR-NLR-mediated plant  
801 immunity in *Nicotiana benthamiana*. *Proceedings of the National Academy of Sciences*  
802 *of the United States of America* **115**, E10979-e10987 (2018).  
803
- 804 36. Saucet SB, Ma Y, Sarris PF, Furzer OJ, Sohn KH, Jones JDG. Two linked pairs of  
805 Arabidopsis TNL resistance genes independently confer recognition of bacterial  
806 effector AvrRps4. *Nature communications* **6**, 6338 (2015).  
807
- 808 37. Venugopal SC, *et al.* Enhanced disease susceptibility 1 and salicylic acid act  
809 redundantly to regulate resistance gene-mediated signaling. *PLoS genetics* **5**,  
810 e1000545 (2009).  
811
- 812 38. Tsuda K, Sato M, Stoddard T, Glazebrook J, Katagiri F. Network properties of robust  
813 immunity in plants. *PLoS genetics* **5**, e1000772 (2009).  
814
- 815 39. Coll NS, Smidler A, Puigvert M, Popa C, Valls M, Dangl JL. The plant metacaspase  
816 AtMC1 in pathogen-triggered programmed cell death and aging: functional linkage with  
817 autophagy. *Cell Death & Differentiation* **21**, 1399-1408 (2014).  
818
- 819 40. Coll NS, *et al.* Arabidopsis type I metacaspases control cell death. *Science (New York,*  
820 *NY)* **330**, 1393-1397 (2010).  
821
- 822 41. Roberts M, Tang S, Stallmann A, Dangl JL, Bonardi V. Genetic requirements for  
823 signaling from an autoactive plant NB-LRR intracellular innate immune receptor. *PLoS*  
824 *genetics* **9**, e1003465 (2013).  
825
- 826 42. Rustérucci C, Aviv DH, Holt BF, 3rd, Dangl JL, Parker JE. The disease resistance  
827 signaling components EDS1 and PAD4 are essential regulators of the cell death  
828 pathway controlled by LSD1 in Arabidopsis. *The Plant cell* **13**, 2211-2224 (2001).  
829
- 830 43. García AV, *et al.* Balanced nuclear and cytoplasmic activities of EDS1 are required for  
831 a complete plant innate immune response. *PLoS pathogens* **6**, e1000970 (2010).

- 832  
833 44. Feys BJ, Moisan LJ, Newman MA, Parker JE. Direct interaction between the  
834 Arabidopsis disease resistance signaling proteins, EDS1 and PAD4. *EMBO J* **20**,  
835 5400-5411 (2001).  
836  
837 45. Feys BJ, *et al.* Arabidopsis SENESCENCE-ASSOCIATED GENE101 stabilizes and  
838 signals within an ENHANCED DISEASE SUSCEPTIBILITY1 complex in plant innate  
839 immunity. *The Plant cell* **17**, 2601-2613 (2005).  
840  
841 46. Voss M, Toelzer C, Bhandari DD, Parker JE, Niefind K. Arabidopsis immunity regulator  
842 EDS1 in a PAD4/SAG101-unbound form is a monomer with an inherently inactive  
843 conformation. *Journal of structural biology* **208**, 107390 (2019).  
844  
845 47. Zhou Y, Hartwig B, James GV, Schneeberger K, Turck F. Complementary Activities of  
846 TELOMERE REPEAT BINDING Proteins and Polycomb Group Complexes in  
847 Transcriptional Regulation of Target Genes. *The Plant cell* **28**, 87-101 (2016).  
848  
849 48. Thomas WJ, Thireault CA, Kimbrel JA, Chang JH. Recombineering and stable  
850 integration of the *Pseudomonas syringae* pv. *syringae* 61 hrp/hrc cluster into the  
851 genome of the soil bacterium *Pseudomonas fluorescens* Pf0-1. *The Plant journal : for*  
852 *cell and molecular biology* **60**, 919-928 (2009).  
853  
854 49. Sohn KH, *et al.* The Nuclear Immune Receptor RPS4 Is Required for RRS1SLH1-  
855 Dependent Constitutive Defense Activation in *Arabidopsis thaliana*. *PLoS genetics* **10**,  
856 e1004655 (2014).  
857  
858 50. Wei H-L, Zhang W, Collmer A. Modular Study of the Type III Effector Repertoire in  
859 *Pseudomonas syringae* pv. *tomato* DC3000 Reveals a Matrix of Effector Interplay in  
860 Pathogenesis. *Cell Reports* **23**, 1630-1638 (2018).  
861  
862 51. Schultink A, Qi T, Lee A, Steinbrenner AD, Staskawicz B. Roq1 mediates recognition  
863 of the *Xanthomonas* and *Pseudomonas* effector proteins XopQ and HopQ1. *The Plant*  
864 *Journal* **92**, 787-795 (2017).  
865  
866 52. Tameling WI, *et al.* The tomato R gene products I-2 and MI-1 are functional ATP  
867 binding proteins with ATPase activity. *The Plant cell* **14**, 2929-2939 (2002).  
868  
869 53. Williams SJ, *et al.* An autoactive mutant of the M flax rust resistance protein has a  
870 preference for binding ATP, whereas wild-type M protein binds ADP. *Molecular plant-*  
871 *microbe interactions : MPMI* **24**, 897-906 (2011).  
872  
873 54. El Kasmi F, *et al.* Signaling from the plasma-membrane localized plant immune  
874 receptor RPM1 requires self-association of the full-length protein. *Proceedings of the*  
875 *National Academy of Sciences of the United States of America* **114**, E7385-e7394  
876 (2017).  
877  
878 55. Mestre P, Baulcombe DC. Elicitor-Mediated Oligomerization of the Tobacco N Disease  
879 Resistance Protein. *The Plant cell* **18**, 491-501 (2006).  
880  
881 56. Burdett H, *et al.* The Plant "Resistosome": Structural Insights into Immune Signaling.  
882 *Cell host & microbe* **26**, 193-201 (2019).  
883  
884 57. Jirage D, *et al.* Arabidopsis *thaliana* PAD4 encodes a lipase-like gene that is important  
885 for salicylic acid signaling. *Proceedings of the National Academy of Sciences of the*  
886 *United States of America* **96**, 13583-13588 (1999).

- 887  
888 58. Morel J-B, Dangl JL. The hypersensitive response and the induction of cell death in  
889 plants. *Cell Death & Differentiation* **4**, 671-683 (1997).  
890  
891 59. Straus MR, Rietz S, Ver Loren van Themaat E, Bartsch M, Parker JE. Salicylic acid  
892 antagonism of EDS1-driven cell death is important for immune and oxidative stress  
893 responses in Arabidopsis. *The Plant journal : for cell and molecular biology* **62**, 628-  
894 640 (2010).  
895  
896 60. Duxbury Z, et al. Induced proximity of a TIR signaling domain on a plant-mammalian  
897 NLR chimera activates defense in plants. *Proceedings of the National Academy of*  
898 *Sciences* **117**, 18832 (2020).  
899  
900 61. Witte CP, Noël LD, Gielbert J, Parker JE, Romeis T. Rapid one-step protein purification  
901 from plant material using the eight-amino acid StrepII epitope. *Plant molecular biology*  
902 **55**, 135-147 (2004).  
903  
904 62. Engler C, et al. A golden gate modular cloning toolbox for plants. *ACS synthetic biology*  
905 **3**, 839-843 (2014).  
906  
907 63. Klock HE, Lesley SA. The Polymerase Incomplete Primer Extension (PIPE) method  
908 applied to high-throughput cloning and site-directed mutagenesis. *Methods in*  
909 *molecular biology (Clifton, NJ)* **498**, 91-103 (2009).  
910  
911 64. Bensmihen S, To A, Lambert G, Kroj T, Giraudat J, Parcy F. Analysis of an activated  
912 ABI5 allele using a new selection method for transgenic Arabidopsis seeds. *FEBS*  
913 *letters* **561**, 127-131 (2004).  
914  
915 65. Gantner J, et al. Peripheral infrastructure vectors and an extended set of plant parts  
916 for the Modular Cloning system. *PloS one* **13**, e0197185 (2018).  
917  
918 66. Folta KM, Kaufman LS. Isolation of Arabidopsis nuclei and measurement of gene  
919 transcription rates using nuclear run-on assays. *Nature protocols* **1**, 3094-3100 (2006).  
920

921 **Acknowledgements.** We thank Franziska Turck (MPIPZ) for providing seeds of the TRB1-  
922 GFP complementation line and Deepak D. Bhandari (at MPIPZ, since 2019 at Michigan  
923 State University) for help with gel filtration chromatography. This work was supported by the  
924 Max-Planck Society and Deutsche Forschungsgemeinschaft (DFG) grants SFB 680 (J.E.P.,  
925 D.L.) and SFB-1403–414786233 (J.E.P., X.S.); DFG-ANR Trilateral ("RADAR" grant to  
926 J.E.P. and J.A.D.) and a Chinese Scholarship Council doctoral fellowship to X.S.

927 **Author contributions.** X.S., D.L., J.M.F., K.K., S.C.S., A.H., P.D., F.L.H.M, I.F., H.N.  
928 contributed immunoprecipitation and LC-MS data; X.S., D.L., J.M.F., H.N., I.F., J.D.G.J.,  
929 J.E.P. designed experiments and analysed data; X.S., J.A.D., J.B., J.R., S.B. generated and  
930 characterized genetic material; X.S. and J.R. performed cell death and pathogen infection  
931 assays; X.S., D.L., J.M.F., J.D.G.J., J.E.P. wrote the manuscript with contributions from all  
932 authors.

933 **Competing interests.** All authors declare no competing interests.

934 **Materials & Correspondence.** Correspondence and material requests should be addressed  
935 to J Jane E. Parker ([parker@mpipz.mpg.de](mailto:parker@mpipz.mpg.de)) and Jonathan D.G. Jones  
936 ([jonathan.jones@TSL.ac.uk](mailto:jonathan.jones@TSL.ac.uk))



937 **Figure Legends**

938 **Fig. 1. Distinct *PAD4/ADR1s* and *SAG101/NRG1s*-dependent mechanisms in**  
939 ***Arabidopsis* TNL immunity. (a)** Overview of mutants used in (b) and (c). Group I comprises  
940 mutants disabled in *SAG101* and/or *NRG1s*: *sag101*, *nrg1.1 nrg1.2 (n2)* and *sag101 n2*.  
941 Group II has mutants in *PAD4* and/or *ADR1s*: *pad4*, *adr1 adr1-L1 adr1-L2 (a3)* and *pad4 a3*.  
942 Group III is composed of cross-branch combinatorial mutants *a3 n2*, *sag101 a3*, *pad4 n2*,  
943 *pad4 sag101*, *sag101 pad4 a3*, *sag101 pad4 n2*, *eds1 pad4 sag101*. **(b)** Growth of  
944 *Pseudomonas syringae* pv. *tomato* DC3000 (*Pst*) *avrRps4* in leaves of *Arabidopsis* Col-0 (Col)  
945 and indicated mutants at 3 days post inoculation (dpi) via syringe infiltration (OD<sub>600</sub>=0.0005).  
946 Bacterial loads are shown as log<sub>10</sub> colony-forming units (CFU) per cm<sup>2</sup>. Experiments were  
947 performed three times independently with four replicates each (Tukey's HSD, α=0.001, n=12).  
948 **(c)** Growth of *Pst avrRps4*, *Pst avrRpt2* or *Pst* (empty vector, EV) in indicated *Arabidopsis*  
949 lines at 3 dpi via syringe infiltration (OD<sub>600</sub>=0.0005). Heatmap represents mean log<sub>10</sub>-  
950 transformed CFU values from three independent experiments, each with four replicates  
951 (n=12). Statistical significance codes are assigned based on Tukey's HSD (α=0.001, n=12).  
952 The jitter plot in (b) shows individual data points used to calculate means on the heatmap for  
953 *Pst avrRps4* infection. *sag101 a3* and *pad4 n2* phenocopy *pad4 sag101* and *a3 n2*, indicating  
954 that *SAG101* does not form functional signalling modules with *ADR1s*, and *NRG1s* with *PAD4*.  
955

956 **Fig. 2. *PAD4* with *ADR1s* promotion of TNL<sup>RRS1-RPS4</sup> cell death is exposed in lines with**  
957 **non-functional *ICS1* and *SAG101-NRG1s*. (a)** A heatmap representation of *Pst avrRps4*,  
958 *Pst avrRpt2* or *Pst* (empty vector, EV) growth at 3 dpi in leaves of indicated genotypes (syringe  
959 infiltration OD<sub>600</sub>=0.0005). The significance codes are based on the Tukey's HSD test  
960 (α=0.001, n=12-16). Data points were combined from three (*Pst avrRps4*, *Pst avrRpt2*) or four  
961 (*Pst*) independent experiments, each with four replicates. **(b)** A heatmap of quantitative cell  
962 death assays conducted on leaves of indicated genotypes after infiltration utilizing the  
963 *Pseudomonas fluorescens* 0-1 effector tester strain (hereafter *Pf0-1*) delivering *avrRps4*  
964 (OD<sub>600</sub>=0.2). Cell death was measured by electrolyte leakage from bacteria-infiltrated leaf  
965 discs at 6, 8, 10 and 24 hpi. Data are displayed as means from four experiments, each with  
966 four replicates (n=16). Statistical significance codes for the difference in means are based on  
967 Tukey's HSD test (α=0.001). In mutants marked in red, the *PAD4-ADR1s* cell death branch  
968 operates in TNL<sup>RRS1-RPS4</sup> immunity when *SAG101-NRG1s* and *ICS1* pathways are not  
969 functional. **(c)** Visual cell death symptoms at 24 hpi *Pf0-1 avrRps4* infiltrating into leaf halves  
970 of indicated genotypes as in (b). The ratio beneath each leaf indicates number of leaves with  
971 visible tissue collapse from all infiltrated leaves in two independent experiments. White arrows

972 mark cell death visible as tissue collapse in a manner dependent on *SAG101-NRG1s*. Red  
973 arrows mark cell death in lines without functional *SAG101-NRG1s* and *ICS1*.

974

975 **Fig. 3. Early effector-dependent NRG1 association with EDS1 and SAG101 in**  
976 ***Arabidopsis* TNL<sup>RRS1-RPS4</sup> triggered ETI. (a)** Heat map of normalized abundance values  
977 (LFQ, log<sub>2</sub> scaled) for proteins detected in liquid chromatography mass-spectrometry (LC-MS)  
978 analyses after α-GFP immunoprecipitation (IP) of PAD4-YFP or SAG101-YFP from total leaf  
979 extracts of respective complementation lines *pPAD4:YFP-PAD4* and *pSAG101:SAG101-YFP*  
980 (both Col *pad4 sag101* background) after infiltration with *Pf0-1 avrRps4* (6 hpi, OD<sub>600</sub>=0.2).  
981 ADR1s are specifically enriched in PAD4-YFP IP samples, whereas NRG1s are more  
982 abundant in the SAG101-YFP IP samples. Samples were collected from four independent  
983 experiments. All protein values shown |Δlog<sub>2</sub>LFQ|≥1, p≤0.05 (relative to YFP-SH IP). Asterisks  
984 indicate detection in three of four replicates. Grey indicates not detected or detected in < 3 of  
985 4 replicates. **(b)** Heat map of LFQ values for proteins detected in LC-MS analyses after IP of  
986 EDS1-YFP and TRB1-GFP from nuclei-enriched extracts of corresponding *Arabidopsis*  
987 complementation lines<sup>43, 47</sup> infiltrated with *Pst avrRps4* (8 hpi, OD<sub>600</sub>=0.1). NRG1.1 and  
988 NRG1.2 are specifically enriched in EDS1-YFP samples. Samples were collected from four  
989 independent experiments. All shown protein |Δlog<sub>2</sub>LFQ|≥1, p≤0.05 (relative to TRB1-GFP IP).  
990 Grey means the protein is not detected or detected in <3 of 4 replicates. **(c)** α-GFP probed  
991 immunoblots of nuclei-enriched extracts from leaves of the *Arabidopsis pEDS1:EDS1-YFP*  
992 complementation line (Col *eds1-2* background) infiltrated with *Pst avrRps4* (OD<sub>600</sub>=0.1, 8 hpi).  
993 Extracts were resolved using native gel filtration. Arrows below protein markers indicate  
994 position of the corresponding peak. Numbers refer to column fractions. EDS1 forms stable  
995 ~100-600 kDa complexes. The experiment was repeated three times with similar results. **(d)**  
996 LC-MS analysis of eluates after α-FLAG IP of total leaf extracts from *Arabidopsis Ws-2 n2*  
997 *pNRG1.2:NRG1.2-HF* complementation line<sup>19</sup> infiltrated with *Pf0-1* EV or *Pf0-1 avrRps4* (4  
998 hpi, OD<sub>600</sub>=0.3). Peptides corresponding to EDS1 and SAG101 were observed in eluates only  
999 after *Pf0-1*-mediated delivery of *avrRps4*. This result was observed in two independent  
1000 experiments. **(e)** Immunoblot analysis of eluates from (d). Asterisk indicates a nonspecific  
1001 band on the α-EDS1 blot for input samples. The analysis was performed on total leaf extracts  
1002 and was repeated four times with similar results. Association of EDS1 with NRG1.2-HF was  
1003 observed only after *Pf0-1*-mediated delivery of *avrRps4*. Ponceau S staining shows equal  
1004 protein loading in input samples on the blot.

1005

1006 **Fig. 4. TNL<sup>Roq1</sup> effector recognition-dependent *Arabidopsis* NRG1 association with**  
1007 **EDS1 and SAG101 in *N. benthamiana*.** (a) Sample collection scheme for experiments in (b)  
1008 and (c). Roq1 dependent cell death is restored in the *Nb eds1 pad4 sag101a sag101b* (*Nb-*  
1009 *epss*) signalling deficient mutant by expressing *Arabidopsis* EDS1, SAG101 and NRG1.1 via  
1010 Agrobacteria infiltration 48 h before XopQ effector delivery. *Pf0-1 XopQ* is syringe-infiltrated  
1011 (OD<sub>600</sub>=0.3) to deliver the effector in a time-resolved manner and study TNL signalling events  
1012 up to 24 hpi. (b) Macroscopic symptoms and quantification of XopQ-triggered cell death at 24  
1013 hpi after infiltrating *Pf0-1 XopQ* in leaves of *Nb-epss* expressing *Arabidopsis* EDS1-FLAG,  
1014 SAG101-FLAG, NRG1.1-3xHA-StrepII (NRG1.1-SH) or ADR1-L2-3xHA-StrepII (ADR1-L2-  
1015 SH). *Pf0-1* served as a “no-ETI” control. Cell death was quantified in electrolyte leakage  
1016 assays 6 h after harvesting leaf discs (24 hpi with *Pf0-1 XopQ*). The experiment was performed  
1017 three times independently, each with four technical replicates (leaf discs) (Tukey’s HSD,  
1018  $\alpha=0.001$ , n=12). Transiently expressed *Arabidopsis* EDS1, SAG101 and NRG1.1 proteins are  
1019 functional in *Pf0-1 XopQ* triggered (*Roq1*) cell death. (c) Coimmunoprecipitation assay  
1020 followed by Western blotting to test for XopQ-triggered associations between *Arabidopsis*  
1021 NRG1.1-SH and FLAG-tagged EDS1 or SAG101 in *Nb-epss* according to the infiltration  
1022 scheme in (a). NRG1.1-SH or ADR1-SH were enriched using  $\alpha$ -HA agarose beads, and  
1023 presence of FLAG-tagged EDS1, SAG101 or GUS was tested by probing blots with  $\alpha$ -FLAG  
1024 antibodies. IP assays were repeated three times independently with similar results. NRG1.1  
1025 association with EDS1 and SAG101 requires Roq1/XopQ ETI activation.

1026  
1027 **Fig. 5. Effector-dependent NRG1-EDS1-SAG101 association requires a functional EDS1**  
1028 **EP domain.** (a) Representation of the *Arabidopsis* EDS1 (green) - SAG101 (purple)  
1029 heterodimer crystal structure (PDB: 4NFU) with highlighted EP-domain cavity surfaces that  
1030 are essential for TNL triggered cell death (Lapin et al., 2019). An  $\alpha$ -helix of the SAG101 EP-  
1031 domain (blue) and residues F419 (magenta) and H476 (orange) in the EDS1 EP-domain are  
1032 shown as ribbon and spheres, respectively. (b,c) Roq1/XopQ dependent cell death (b) and  
1033 bacterial resistance (c) in leaves of *Nb-epss* transiently expressing of C-terminally FLAG-  
1034 tagged EDS1 wildtype and mutant variants with SAG101-FLAG and NRG1.1-SH or ADR1-L2-  
1035 SH. Cell death was triggered by infiltrating *Pf0-1 XopQ* at 48 h after Agrobacteria infiltration to  
1036 express the *Arabidopsis* proteins; photos of leaf discs for the electrolyte leakage assays were  
1037 taken at 24 h. Roq1 resistance to *Xanthomonas campestris* pv. *vesicatoria* (*Xcv*) strain 85-10  
1038 expressing XopQ. F419E and H476Y mutations in the *Arabidopsis* EDS1 EP-domain  
1039 abrogated cell death and resistance, as shown in <sup>26</sup> using different plasmid backbones and  
1040 tags. Experiments were performed three times independently, each with four replicates (leaf  
1041 discs) (Tukey’s HSD,  $\alpha=0.001$ , n=12). (d) IP followed by Western blot analysis to test

1042 dependency of associations between *Arabidopsis* EDS1-SAG101 and NRG1.1 in *Nb-epss* on  
1043 a functional EDS1 EP- domain cavity. Leaves of *Nb-epss* were infiltrated with *Agrobacteria* to  
1044 express FLAG-tagged EDS1 or its variants EDS1<sup>F419E</sup> and EDS1<sup>H476Y</sup>, SAG101-FLAG and  
1045 NRG1.1-SH or PAD4-FLAG, with ADR1-L2-SH and GUS-FLAG as negative controls. At 2 dpi,  
1046 *Pf0-1 XopQ* (OD<sub>600</sub>=0.3) was infiltrated, and the triggered samples were collected at 10 hpi.  
1047 Following IP with  $\alpha$ -HA agarose beads, input and and IP fractions were probed with  $\alpha$ -HA and  
1048  $\alpha$ -FLAG antibodies. Roq1/XopQ dependent association of NRG1.1-SH with EDS1-FLAG and  
1049 SAG101-FLAG was abolished in samples with mutated EDS1 EP-domain variants. Similar  
1050 results were obtained in three independent experiments.

1051

1052 **Fig. 6. Association between *Arabidopsis* NRG1.1, EDS1 and SAG101 requires an intact**

1053 **NRG1.1 P-loop. (a)** A structure homology model of *Arabidopsis* NRG1.1 based on the ZAR1

1054 resistosome (PDB: 6J5T, chains G-O). NRG1.1 amino acids E14 and E27 (red sticks) and

1055 L21 and K22 (blue sticks) are predicted to align with functionally defined residues E11, E18,

1056 F9, L10 and L14 in the N-terminal ZAR1  $\alpha$ 1-helix. The modelled NRG1.1 P-loop motif (G199

1057 K200 T201) is shown as cyan sticks. *Pf0-1 XopQ*-triggered cell death **(b)** and bacterial (*Xcv*)

1058 growth restriction **(c)** in *Nb-epss* expressing *Arabidopsis* NRG1.1-SH wildtype,

1059 NRG1.1<sup>E14A/E27A</sup>, NRG1.1<sup>L21A/K22A</sup> and NRG1.1<sup>G199A/K200A/T201A</sup> variants together with EDS1-

1060 FLAG and SAG101-FLAG. *Arabidopsis* proteins were expressed via *Agrobacteria*-mediated

1061 transient expression assays 2 d before *Pf0-1 XopQ* (OD<sub>600</sub>=0.3) or simultaneously with *Xcv*

1062 (OD<sub>600</sub>=0.0005) infiltration. An intact NRG1.1 predicted N-terminal  $\alpha$ -helix and P-loop are

1063 required for NRG1.1 function in reconstituted *Roq1* ETI cell death and pathogen resistance.

1064 Experiments were performed three times independently, each with four technical replicates

1065 (leaf discs) (Tukey's HSD,  $\alpha$ =0.001, n=12). **(d)** IP and Western blot analyses testing

1066 associations of *Arabidopsis* NRG1.1 mutant variants with EDS1 and SAG101 in *Nb-epss* after

1067 triggering *Roq1* signalling by *Pf0-1 XopQ* infiltration (OD<sub>600</sub>=0.3; 10 hpi). *Arabidopsis* EDS1-

1068 FLAG, SAG101-FLAG with NRG1.1-SH, and using GUS-FLAG and *Arabidopsis* ADR1-L2-SH

1069 as negative controls, were expressed using *Agrobacteria* 2 d prior to *Pf0-1 XopQ* infiltration.

1070 After  $\alpha$ -HA IP, the indicated fractions were analyzed with  $\alpha$ -HA and  $\alpha$ -FLAG antibodies by

1071 Western blotting. An NRG1.1 intact P-loop but not N-terminal amino acids are essential for

1072 *Roq1/XopQ*-dependent NRG1.1 association with the EDS1-SAG101 dimer. The experiment

1073 was repeated three times independently with similar results. **(e)** Model of molecular events

1074 leading to generation of an *Arabidopsis* EDS1-SAG101-NRG1 signalling complex that is

1075 essential for TNL receptor activated defence. NRG1-EDS1-SAG101 association is dependent

1076 on TNL-effector activation and requires an intact EDS1-SAG101 heterodimer EP domain

1077 cavity (purple circle) and NRG1 nucleotide binding domain P-loop motif. In two depicted

Sun, Lapin, Feehan et al., Triggered NRG1-EDS1-SAG101 association

1078 scenarios, an effector-induced TNL oligomer with NADase activity leads to activation  
1079 (asterisks) of EDS1-SAG101 via the EP domain cavity ('Path A', asterisk inside the purple  
1080 circle) or NRG1 ('Path B'). These paths are not mutually exclusive. EDS1-SAG101-NRG1  
1081 assembly precedes and is necessary for TNL triggered cell death and resistance involving a  
1082 predicted NRG1 N-terminal HeLo domain  $\alpha$ -helix.

(a)

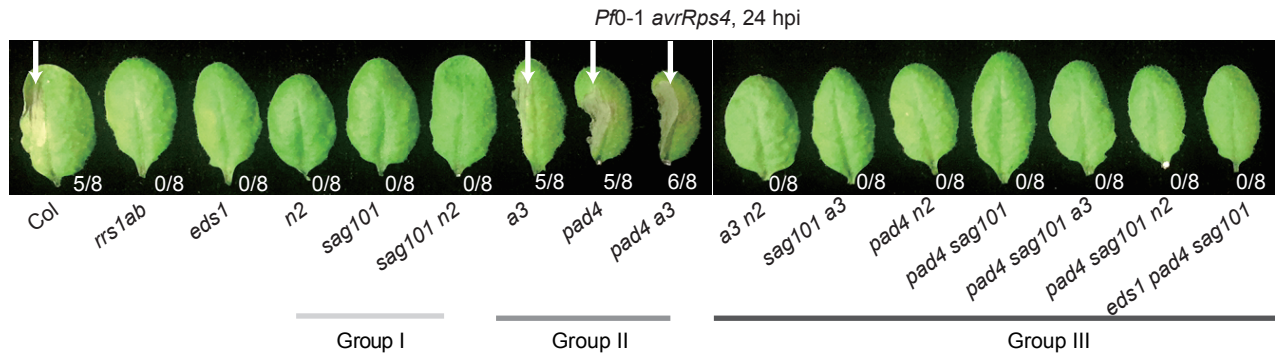

(b)

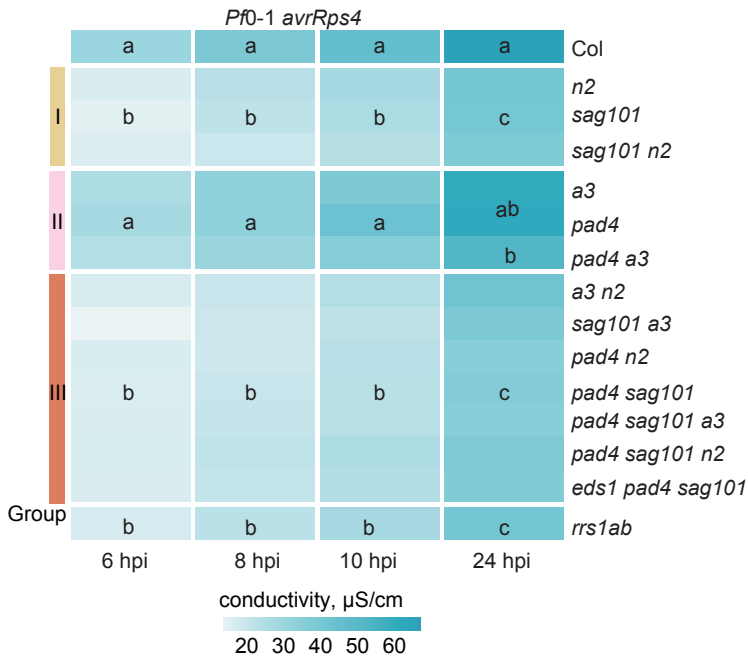

(c)

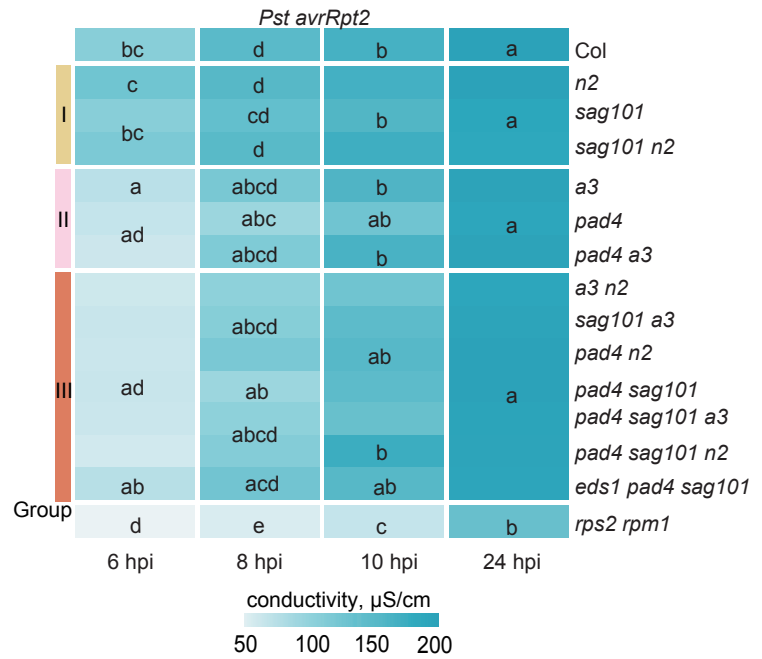

**Supplementary Figure 1. No evidence for the cross-use of components between the *PAD4-ADR1s* and *SAG101-NRG1s* branches in *Arabidopsis* NLR cell death.** Related to Fig. 1. (a) Macroscopic symptoms of TNL<sup>RRS1-RPS4</sup> cell death triggered by *Pf0-1 avrRps4* in Col-0 (Col), *rrs1a rrs1b* (*rrs1ab*), and mutants with mutated *SAG101* and/or *NRG1s* (group I), *PAD4* and/or *ADR1s* (group II) or their cross-branch combinations (group III). White arrow indicates cell death visible as tissue collapse at 24 hours post bacteria infiltration (hpi). Numbers indicate number of leaves with visible tissue collapse from the total number of infiltrated leaves from four plants in one experiment. The experiment was repeated three times with similar results. (b, c) A heatmap of electrolyte leakage to quantify cell death at 6, 8, 10 and 24 hpi with *Pf0-1 avrRps4* (OD<sub>600</sub>=0.2) (b) or *Pst avrRpt2* (OD<sub>600</sub>=0.02) for indicated genotypes as in (a) and the *rpm1 rps2* mutant. Data are displayed as mean conductivity from three independent experiments with four technical replicates each. Statistical analysis used posthoc Tukey's HSD test ( $\alpha=0.001$ ,  $n=12$ ). *PAD4* and *SAG101* do not form signalling branches with *NRG1s* and *ADR1s*, respectively, to promote receptor NLR-dependent (RRS1-RPS4 and RPS2) cell death.

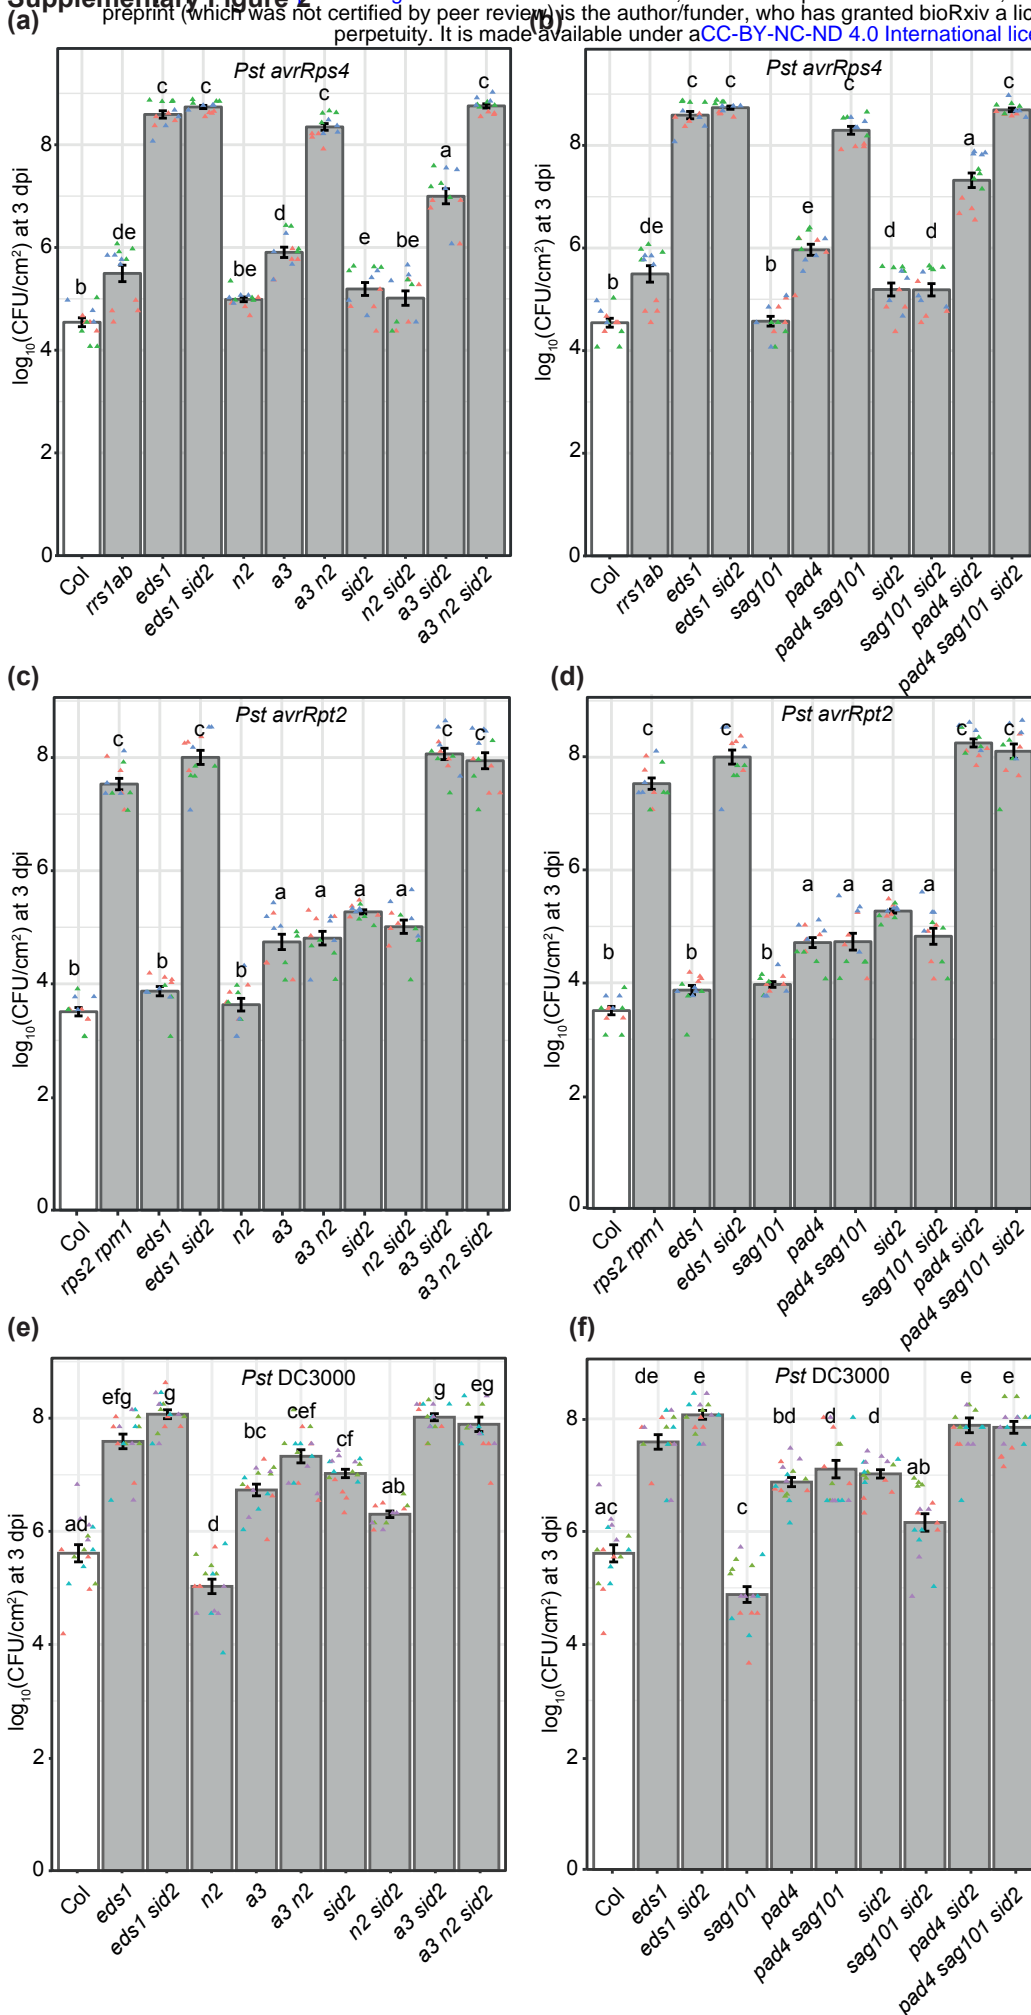

**Supplementary Figure 2. Growth of *Pst avrRps4* (a, b), *Pst avrRpt2* (c, d) and *Pst* (empty vector, (e, f)) in mutants defective in *ICS1/SID2* and *PAD4-ADR1s* or *SAG101-NRG1s* branches. Related to Fig. 2a. Bacterial loads are expressed as colony forming units (CFU) per  $\text{cm}^2$  at 3 dpi on a  $\log_{10}$  scale. Bacteria were syringe-infiltrated ( $\text{OD}_{600}=0.0005$ ). The experiments were performed three times independently with four technical replicates (leaf discs) each (Tukey's HSD,  $\alpha=0.001$ ,  $n=12$ ).**

*Pf0-1 avrRps4*, 24 hpi

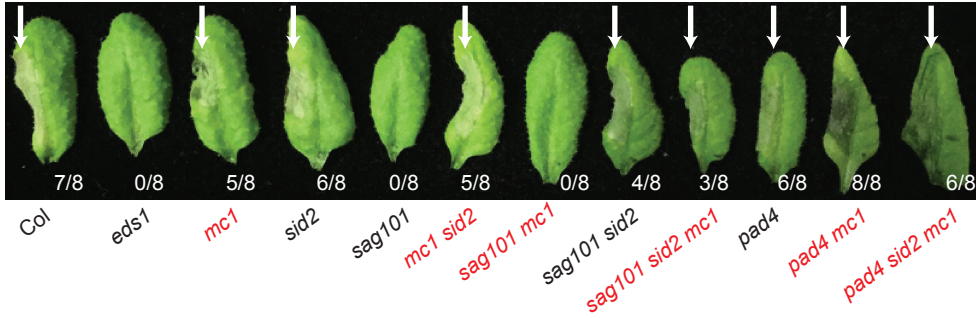

**Supplementary Figure 3. *Metacaspase 1 (MC1)* is dispensable for the TNL<sup>RRS1-RPS4</sup> cell death involving *SAG101-NRG1s* and *PAD4-ADR1s*.** Macroscopic symptoms of cell death triggered by *Pf0-1 avrRps4* ( $OD_{600}=0.2$ ) in Col-0 (Col) single (*eds1*, *sag101*, *pad4*, *sid2*, *mc1*) and indicated combinatorial mutants. White arrows point to collapsed leaf areas at 24 hpi. Genotypes in red contain the *mc1* mutation. Eight leaves from four plants were syringe-infiltrated with *Pf0-1 avrRps4*, and the number of collapsed leaves was counted at 24 hpi. The experiment was repeated three times with similar results.



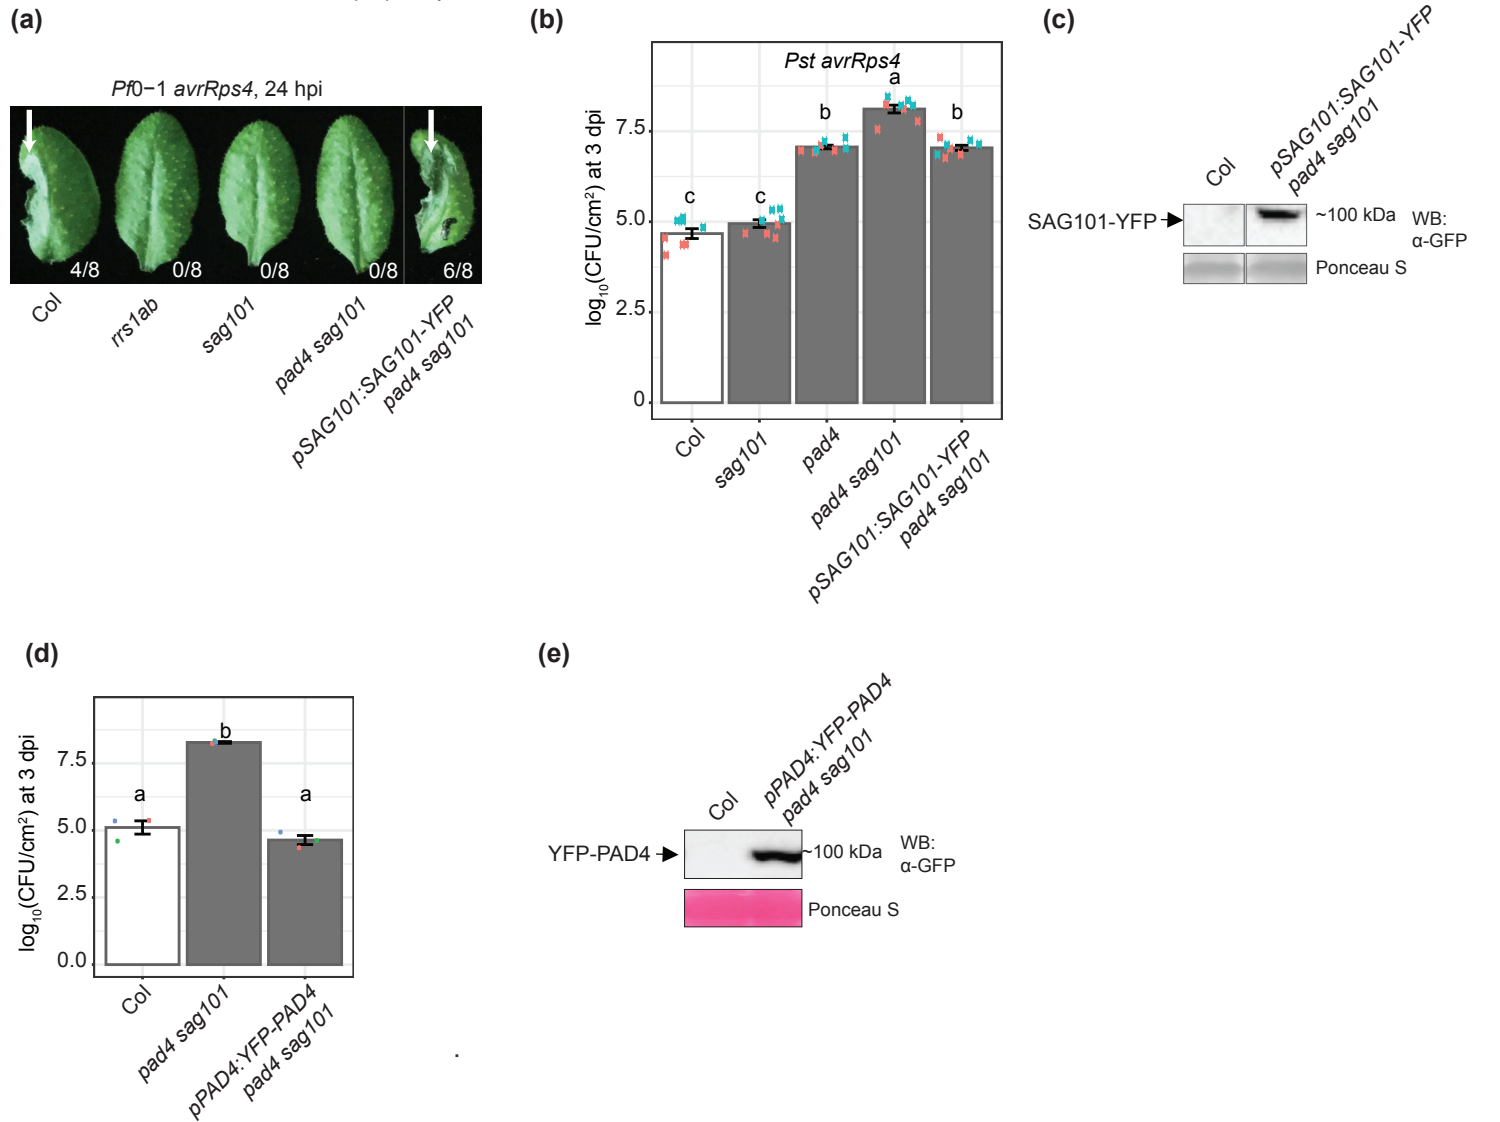

**Supplementary Figure 4. Characterization of the complementation lines carrying *pSAG101:SAG101-YFP* and *pPAD4:YFP-PAD4* in the Col-0 *pad4 sag101* background. (a, b) Complementation in the *pSAG101:SAG101-YFP* (*pad4 sag101*) T3 homozygous line was assessed using RRS1-RPS4 cell death (a) and bacterial resistance (b) assays with Col-0 (Col), *rrs1a rrs1b* (*rrs1ab*), *sag101* and *pad4 sag101* as controls. (a) Cell death was examined visually at 24 hpi of *Pf0-1 avrRps4*. Numbers refer to the number of leaves showing tissue collapse vs. all infiltrated leaves. The experiment was repeated three times with similar results. (b) *Pst avrRps4* titers ( $\log_{10}$  of CFU/cm<sup>2</sup>) were determined at 3 dpi after bacteria syringe-infiltration ( $\text{OD}_{600} = 0.0005$ ). The experiment was performed twice with four technical replicates each (Tukey's HSD,  $\alpha = 0.001$ ,  $n = 8$ ). Both *SAG101*-dependent RPS4-RRS1 cell death and resistance were recovered by the *pSAG101:SAG101-YFP* construct transformed into the signalling-defective *pad4 sag101* mutant. (c) Western blot analysis *SAG101-YFP* steady-state levels in the transgenic line in (a, b) using  $\alpha$ -GFP antibodies. Bands were cropped from same blot. The experiment was performed twice. The *SAG101-YFP* fusion protein produced a band of the indicated expected size. (d) *Pst avrRps4* titers in *pPAD4:YFP-PAD4 pad4 sag101* T3 homozygous line at 3 dpi ( $\text{OD}_{600} = 0.0005$ ; syringe infiltration) (three independent experiments, one technical replicate from each, Tukey's HSD,  $\alpha = 0.001$ ,  $n = 3$ ). (e) Immunoblot analysis of *PAD4-YFP* steady-state levels in the transgenic line in (d) using  $\alpha$ -GFP antibody. The Western blotting detection was repeated two times with similar results.**

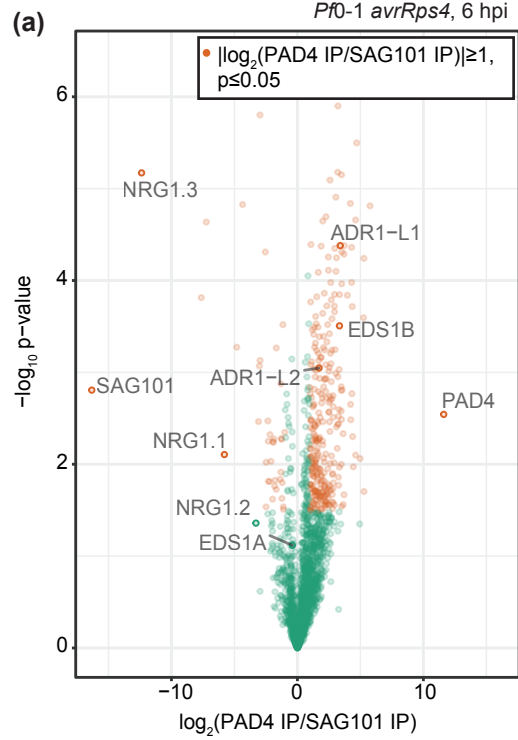

**Supplementary Figure 5. Selective enrichment of RNLs with SAG101 and PAD4 in *Arabidopsis* leaves upon activation of  $\text{TNL}^{\text{RRS1-RPS4}}$ .** (a) Volcano plot of normalized abundances (LFQ,  $\log_2$  scale) for proteins copurified with YFP-PAD4 and SAG101-YFP from total leaf extracts of the respective complementation lines *pPAD4:YFP-PAD4* and *pSAG101:SAG101-YFP* (both Col-0 *pad4 sag101* background) infiltrated with *Pf0-1 avrRps4* (6 hpi,  $\text{OD}_{600} = 0.2$ ). Proteins enriched in PAD4-YFP vs. SAG101-YFP IPs are shown in orange ( $|\log_2(\text{PAD4 IP}/\text{SAG101 IP})| \geq 1$ , permutation  $p \leq 0.05$ ). Missing values were imputed. NRG1.1, NRG1.2 and NRG1.3 are enriched in the SAG101-YFP samples, while ADR1 and ADR1-L1 were detected only on PAD4-YFP samples. The IP-MS analysis was performed on samples collected in four independent experiments.

## Supplementary Figure 6

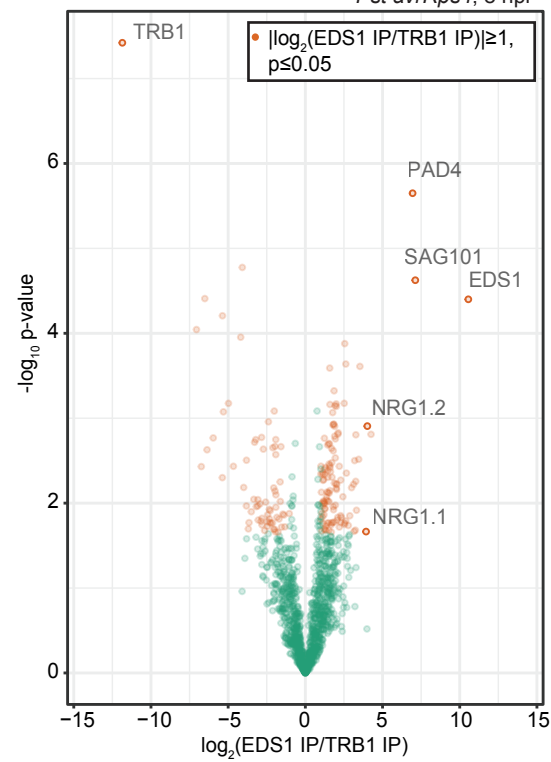

**Supplementary Figure 6. NRG1 proteins specifically co-purify with EDS1 in *Arabidopsis* leaves upon activation of TNL-RRS1-RPS4.** Volcano plot of normalized abundances (LFQ,  $\log_2$  scale) of proteins detected in mass-spectrometry (MS) analyses after immunoprecipitation (IP) of EDS1-YFP and TRB1-GFP from nuclear extracts of corresponding *Arabidopsis* complementation lines infiltrated with *Pst avrRps4* (8 hpi,  $\text{OD}_{600}=0.1$ ). In orange are proteins enriched in EDS1-YFP vs. TRB1-GFP samples ( $|\log_2(\text{EDS1-YFP}/\text{TRB1-GFP})| \geq 1$ , permutation  $p \leq 0.05$ ; missing values imputed). Samples for the MS analysis were collected in four independent experiments. NRG1.1 and NRG1.2 are specifically enriched in EDS1-YFP samples.

**Supplementary Figure 1. No evidence for the cross-use of components between the *PAD4-ADR1s* and *SAG101-NRG1s* branches in *Arabidopsis* NLR cell death.** Related to Fig. 1. **(a)** Macroscopic symptoms of TNL (RRS1-RPS4) cell death triggered by *Pf0-1 avrRps4* in Col-0 (Col), *rrs1a rrs1b (rrs1ab)*, and mutants with mutated *SAG101* and/or *NRG1s* (group I), *PAD4* and/or *ADR1s* (group II) or their cross-branch combinations (group III). White arrow indicates cell death visible as tissue collapse at 24 hours post bacteria infiltration (hpi). Numbers indicate number of leaves with visible tissue collapse from the total number of infiltrated leaves from four plants in one experiment. The experiment was repeated three times with similar results. **(b, c)** A heatmap of electrolyte leakage to quantify cell death at 6, 8, 10 and 24 hpi with *Pf0-1 avrRps4* ( $OD_{600}=0.2$ ) (b) or *Pst avrRpt2* ( $OD_{600}=0.02$ ) for indicated genotypes as in (a) and the *rpm1 rps2* mutant. Data are displayed as mean conductivity from three independent experiments with four technical replicates each. Statistical analysis used posthoc Tukey's HSD test ( $\alpha=0.001$ ,  $n=12$ ). *PAD4* and *SAG101* do not form signaling branches with *NRG1s* and *ADR1s*, respectively, to promote receptor NLR-dependent (RRS1-RPS4 and RPS2) cell death.

**Supplementary Figure 2. Growth of *Pst avrRps4* (a, b), *Pst avrRpt2* (c, d) and *Pst* (empty vector, (e, f)) in mutants defective in *ICS1/SID2* and *PAD4-ADR1s* or *SAG101-NRG1s* branches.** Related to Fig. 2a. Bacterial loads are expressed as colony forming units (CFU) per  $cm^2$  at 3 dpi on a  $\log_{10}$  scale. Bacteria were syringe-infiltrated ( $OD_{600}=0.0005$ ). The experiments were performed three times independently with four technical replicates (leaf discs) each (Tukey's HSD,  $\alpha=0.001$ ,  $n=12$ ).

**Supplementary Figure 3. *Metacaspase 1 (MC1)* is dispensable for the TNL RRS1-RPS4 cell death involving *SAG101-NRG1s* and *PAD4-ADR1s*.** Macroscopic symptoms of cell death triggered by *Pf0-1 avrRps4* ( $OD_{600}=0.2$ ) in Col-0 (Col) single (*eds1*, *sag101*, *pad4*, *sid2*, *mc1*) and indicated combinatorial mutants. White arrows point to collapsed leaf areas at 24 hpi. Genotypes in red contain the *mc1* mutation. Eight leaves from four plants were syringe-infiltrated with *Pf0-1 avrRps4*, and the number of collapsed leaves was counted at 24 hpi. The experiment was repeated three times with similar results.

**Supplementary Figure 4. Characterization of the complementation lines carrying *pSAG101:SAG101-YFP* and *pPAD4:YFP-PAD4* in the Col-0 *pad4 sag101* background.** **(a, b)** Complementation in the *pSAG101:SAG101-YFP (pad4 sag101)* T3 homozygous line was assessed using RPS4-RRS1 cell death (a) and bacterial resistance (b) assays with Col-0 (Col), *rrs1a rrs1b (rrs1ab)*, *sag101* and *pad4 sag101* as controls. (a) Cell death was examined visually at 24 hpi of *Pf0-1 avrRps4*. Numbers refer to the number of leaves showing tissue collapse vs. all

infiltrated leaves. The experiment was repeated three times with similar results. (b) *Pst avrRps4* titers ( $\log_{10}$  of CFU/cm<sup>2</sup>) were determined at 3 dpi after bacteria syringe-infiltration ( $OD_{600}=0.0005$ ). The experiment was performed twice with four technical replicates each (Tukey's HSD,  $\alpha=0.001$ ,  $n=8$ ). Both SAG101-dependent RPS4-RRS1 cell death and resistance were recovered by the *pSAG101:SAG101-YFP* construct transformed into the signaling-defective *pad4 sag101* mutant. (c) Western blot analysis SAG101-YFP steady-state levels in the transgenic line in (a, b) using  $\alpha$ -GFP antibodies. Bands were cropped from same blot. The experiment was performed twice. The SAG101-YFP fusion protein produced a band of the indicated expected size. (d) *Pst avrRps4* titers in *pPAD4:YFP-PAD4 pad4 sag101* T3 homozygous line at 3 dpi ( $OD_{600}=0.0005$ ; syringe infiltration) (three independent experiments, one technical replicate from each, Tukey's HSD,  $\alpha=0.001$ ,  $n=3$ ). (e) Immunoblot analysis of PAD4-YFP steady-state levels in the transgenic line in (d) using  $\alpha$ -GFP antibody. The detection was repeated two times with similar results.

**Supplementary Figure 5. Selective enrichment of RNLs with SAG101 and PAD4 in Arabidopsis leaves upon activation of TNL<sup>RRS1-RPS4</sup>.** Volcano plot of normalized abundances (LFQ,  $\log_2$  scale) for proteins copurified with PAD4-YFP and SAG101-YFP from total leaf extracts of the respective complementation lines *pPAD4:YFP-PAD4* and *pSAG101:SAG101-YFP* (both Col-0 *pad4 sag101* background) infiltrated with *Pf0-1 avrRps4* (6 hpi,  $OD_{600}=0.2$ ). Proteins enriched in PAD4-YFP vs. SAG101-YFP IPs are shown in orange ( $(|\log_2(\text{YFP-PAD4}/\text{SAG101-YFP})| \geq 1, \text{ permutation } p \leq 0.05)$ ). Missing values were imputed. NRG1.1, NRG1.2 and NRG1.3 are enriched in the SAG101-YFP samples, while ADR1 and ADR1-L1 were detected only on PAD4-YFP samples. The IP-MS analysis was performed on samples collected in four independent experiments.

**Supplementary Figure 6. NRG1 proteins specifically co-purify with EDS1 in Arabidopsis leaves upon activation of TNL<sup>RRS1-RPS4</sup>.** Volcano plot of normalized abundances (LFQ,  $\log_2$  scale) of proteins detected in mass-spectrometry (MS) analyses after immunoprecipitation (IP) of EDS1-YFP and TRB1-GFP from nuclear extracts of corresponding *Arabidopsis* complementation lines infiltrated with *Pst avrRps4* (8 hpi,  $OD_{600}=0.1$ ). In orange are proteins enriched in EDS1-YFP vs. TRB1-GFP samples ( $(|\log_2(\text{EDS1-YFP}/\text{TRB1-GFP})| \geq 1, \text{ permutation } p \leq 0.05; \text{ missing values imputed})$ ). Samples for the MS analysis were collected in four independent experiments. NRG1.1 and NRG1.2 are specifically enriched in EDS1-YFP samples.

**Supplementary Figure 7.** Multiple sequence alignments of selected helper RPW8 domain NLRs (RNLs), helper CNLs (NRC), receptor CNLs and TNLs over the P-loop motif sequences. The P-

loop is indicated with red line. Multiple sequence alignments were built (Clustal Omega) and visualised with the msa package in R. Accession numbers of NLRs in the alignment: NRG1.1 – AT5G66900.1, NRG1.2 – AT5G66910.1, *Lus*NRG1 - Lus10022464, *Nb*NRG1 - Niben101Scf02118g00018.1, *At*ADR1-L2 - AT5G04720.1, *Sl*ADR1 - Solyc04g079420.3.1, *Nb*ADR1 - Niben101Scf02422g02015.1, *S/NRC*4 - Solyc04g007070.3.1, *S/NRC*3 - XP\_004238948.1, *At*ZAR1 - AT3G50950.2, N - Q40392, Roq1 - ATD14363.1, RPP4 - F4JNA9, RPS4 - Q9XGM3, RPM1 - Q39214, Rx - Q9XGF5.

## Supplementary Text

### Methods (continued)

#### Preparation of peptides for LC-MS/MS analysis in IP experiments with EDS1-YFP and TRB1-GFP complementation lines

Immunoprecipitated proteins in Tris-Urea were reduced with dithiothreitol, alkylated with chloroacetamide, and digested with trypsin (1:100) o/n. Samples were desalted using stage tips with C18 Empore disk membranes (3 M) <sup>1</sup>.

#### Preparation of peptides for LC-MS/MS analysis in IP experiments with YFP-PAD4 and SAG101-YFP complementation lines

Proteins (from GFP-trapA enrichment) were submitted to an on-bead digestion. In brief, dry beads were re-dissolved in 25  $\mu$ L digestion buffer 1 (50 mM Tris, pH 7.5, 2M urea, 1mM DTT, 5 ng/ $\mu$ L trypsin) and incubated for 30 min at 30°C in a Thermomixer with 400 rpm. Next, beads were pelleted, and the supernatant was transferred to a fresh tube. Digestion buffer 2 (50 mM Tris, pH 7.5, 2M urea, 5 mM CAA) was added to the beads, after mixing the beads were pelleted, the supernatant was collected and combined with the previous one. The combined supernatants were then incubated o/n at 32 °C in a Thermomixer with 400 rpm; samples were protected from light during incubation. The digestion was stopped by adding 1  $\mu$ L TFA and desalted with C18 Empore disk membranes according to the StageTip protocol <sup>1</sup>.

#### Label-free LC-MS/MS data acquisition and data processing for IP experiments with EDS1-YFP, YFP-PAD4, SAG101-YFP and TRB1-GFP

Dried peptides were re-dissolved in 2% ACN, 0.1% TFA (10  $\mu$ L) for analysis and measured without dilution. Samples were analyzed using an EASY-nLC 1200 (Thermo Fisher Scientific) coupled to a Q Exactive Plus mass spectrometer (Thermo Fisher Scientific). Peptides were separated on 16 cm frit-less silica emitters (New Objective, 0.75  $\mu$ m inner diameter), packed in-house with reversed-phase ReproSil-Pur C18 AQ 1.9  $\mu$ m resin (Dr. Maisch). Peptides were loaded on the column and eluted for 115 min using a segmented linear gradient of 5% to 95% solvent B (0 min: 5%B; 0-5 min -> 5%B; 5-65 min -> 20%B; 65-90 min ->35%B; 90-100 min -> 55%; 100-105 min ->95%, 105-115 min ->95%) (solvent A 0% ACN, 0.1% FA; solvent B 80% ACN, 0.1%FA) at a flow rate of 300 nL/min. Mass spectra were acquired in data-dependent acquisition mode with a TOP15 method. MS spectra were acquired in the Orbitrap analyzer with a mass range of 300–1750 m/z at a resolution of 70,000 FWHM and a target value of  $3 \times 10^6$  ions. Precursors were selected with an isolation window of 1.3 m/z. HCD fragmentation was performed at a normalized collision energy of 25. MS/MS spectra were acquired with a target value of 105 ions at a resolution of 17,500 FWHM, a maximum injection time (max.) of 55 ms and a fixed first mass of m/z 100. Peptides with a charge of +1, greater than 6, or with unassigned charge state were excluded from fragmentation for MS2, dynamic exclusion for 30s prevented repeated selection of precursors.

Raw data were processed using MaxQuant software (version 1.6.3.4, <http://www.maxquant.org/>) <sup>2</sup> with label-free quantification (LFQ) and iBAQ enabled <sup>2,3</sup>. MS/MS spectra were searched by the Andromeda search engine against a combined database containing the sequences from *A. thaliana* (TAIR10\_pep\_20101214; [ftp://ftp.arabidopsis.org/home/tair/Proteins/TAIR10\\_protein\\_lists/](ftp://ftp.arabidopsis.org/home/tair/Proteins/TAIR10_protein_lists/)) and sequences of 248 common contaminant proteins and decoy sequences. Trypsin specificity was required and a maximum of two missed cleavages allowed. Minimal peptide length was set to seven amino acids. Carbamidomethylation of cysteine residues was set as fixed, oxidation of methionine and protein N-terminal acetylation as variable modifications. Peptide-spectrum-matches and proteins were retained if they were below a false discovery rate of 1%. Statistical analysis of

the MaxLFQ values was carried out using Perseus (version 1.5.8.5, <http://www.maxquant.org/>). Quantified proteins were filtered for reverse hits and hits “identified by site” and MaxLFQ values were  $\log_2$  transformed. After grouping samples by condition only those proteins were retained for the subsequent analysis that had three valid values in one of the conditions. Two-sample t-tests were performed using a permutation-based FDR of 5%. Alternatively, quantified proteins were grouped by condition and only those hits were retained that had 4 valid values in one of the conditions. Missing values were imputed from a normal distribution (1.8 downshift, separately for each column). Volcano plots were generated in Perseus using an FDR of 5% and an  $S_0=1$ . The Perseus output was exported and further processed using Excel.

#### LC-MS/MS analysis of NRG1.2-copurified proteins

Samples were resolved by SDS-PAGE with RunBlue™ 4-20% TEO-Tricine (BCG42012) and stained with InstantBlue® Coomassie Protein Stain (ab119211). Bands were excised from gel with sterile blade and stored at  $-20\text{ }^\circ\text{C}$  if not submitted fresh. LC-MS and data processing was carried out as previously described<sup>4</sup>. Data was analysed as total spectrum counts in Scaffold Viewer (Proteome Software) and filtered for a protein threshold probability  $> 99\%$ , peptide threshold probability  $> 95\%$ , and a minimum of two peptides identified.



**Supplementary Table 1.** Plant genetic materials used in this study

| Denoted name                    | Full name                                                  | Description, reference                                                    |
|---------------------------------|------------------------------------------------------------|---------------------------------------------------------------------------|
| <i>eds1</i>                     | Col-0/Ler <i>eds1-2</i> (multiple backcrosses to Col-0)    | 5                                                                         |
| <i>sag101</i>                   | Col-0 <i>sag101-3</i> (GABI-Kat 476E10)                    | 6                                                                         |
| <i>pad4</i>                     | Col-0 <i>pad4-1</i>                                        | 7                                                                         |
| <i>pad4 sag101</i>              | <i>pad4-1 sag101-3</i>                                     | 6                                                                         |
| <i>eds1 pad4 sag101</i>         | <i>eds1-2 pad4-1 sag101-3</i>                              | 8                                                                         |
| <i>sid2</i>                     | <i>sid2-1</i>                                              | 9                                                                         |
| <i>eds1 sid2</i>                | <i>eds1-2 sid2-1</i>                                       | 6                                                                         |
| <i>pad4 sid2</i>                | <i>pad4-1 sid2-1</i>                                       | 6                                                                         |
| <i>sag101 sid2</i>              | <i>sag101-3 sid2-1</i>                                     | This study, cross between <i>eds1-2 sag101-3 pad4-1</i> and <i>sid2-1</i> |
| <i>pad4 sag101 sid2</i>         | <i>pad4-1 sag101-3 sid2-1</i>                              | This study, cross between <i>eds1-2 sag101-3 pad4-1</i> and <i>sid2-1</i> |
| <i>n2</i>                       | <i>nrg1.1 nrg1.2</i>                                       | 10                                                                        |
| <i>a3</i>                       | <i>adr1 adr1-L1 adr1-L2</i>                                | 11                                                                        |
| <i>n2 a3</i>                    | <i>nrg1.1 nrg1.2 adr1 adr1-L1 adr1-L2</i>                  | 10                                                                        |
| <i>n2 sid2</i>                  | <i>nrg1.1 nrg1.2 sid2-1</i>                                | This study, cross between <i>n2 a3</i> and <i>sid2</i>                    |
| <i>a3 sid2</i>                  | <i>adr1 adr1-L1 adr1-L2 sid2-1</i>                         |                                                                           |
| <i>a3 n2 sid2</i>               | <i>nrg1.1 nrg1.2 adr1 adr1-L1 adr1-L2 sid2-1</i>           |                                                                           |
| <i>sag101 n2</i>                | <i>nrg1.1 nrg1.2 sag101-3</i>                              | This study, cross between <i>n2 a3</i> and <i>eds1 sag101 pad4</i>        |
| <i>pad4 n2</i>                  | <i>nrg1.1 nrg1.2 pad4-1</i>                                |                                                                           |
| <i>sag101 a3</i>                | <i>adr1 adr1-L1 adr1-L2 sag101-3</i>                       |                                                                           |
| <i>pad4 a3</i>                  | <i>adr1 adr1L1 adr1-L2 pad4-1</i>                          |                                                                           |
| <i>sag101 pad4 a3</i>           | <i>adr1 adr1-L1 adr1-L2 sag101-3 pad4-1</i>                |                                                                           |
| <i>sag101 pad4 n2</i>           | <i>nrg1.1 nrg1.2 sag101-3 pad4-1</i>                       |                                                                           |
| <i>mc1</i>                      | <i>mc1-1</i> (GABI-Kat 096A10)                             |                                                                           |
| <i>mc1 sid2</i>                 | <i>mc1 sid2-1</i>                                          | This study, cross between <i>mc1</i> and <i>pad4 sag101 sid2</i>          |
| <i>sag101 mc1</i>               | <i>sag101-3 mc</i>                                         | This study, cross between <i>mc1</i> and <i>pad4 sag101 sid2</i>          |
| <i>sag101 sid2 mc1</i>          | <i>sag101-3 sid2-1 mc1</i>                                 | This study, cross between <i>mc1</i> and <i>pad4 sag101 sid2</i>          |
| <i>pad4 mc1</i>                 | <i>pad4-1 mc1</i>                                          | This study, cross between <i>mc1</i> and <i>pad4 sag101 sid2</i>          |
| <i>pad4 sid2 mc1</i>            | <i>pad4-1 sid2-1 mc1</i>                                   | This study, cross between <i>mc1</i> and <i>pad4 sag101 sid2</i>          |
| <i>pEDS1:EDS1-YFP</i>           | pXCG <i>pEDS1:EDS1-YFP</i> , Col-0/Ler <i>eds1-2</i>       | (García et al., 2010), for MS analysis                                    |
| <i>p35S:TRB1-GFP</i>            | pAM-PAT <i>p35S:TRB1-GFP</i> Col-0 <i>trb1-1</i>           | 13                                                                        |
| <i>p35:StreptII-3xHA-YFP</i>    | pAM-PAT <i>StreptII-3xHA-YFP</i> Col-0                     | 10                                                                        |
| <i>pSAG101:SAG101-YFP</i>       | pXCG <i>pSAG101:SAG101-YFP</i> , <i>pad4-1 sag101-3</i>    | This study                                                                |
| <i>pPAD4:PAD4-YFP</i>           | pAlligator2 <i>pPAD4:YFP-PAD4</i> , <i>pad4-1 sag101-3</i> | This study                                                                |
| <i>pNRG1.2:NRG1.2-HF</i>        | pNRG1.2:NRG1.2-6xHis-3xFLAG, Ws-2 <i>nrg1a nrg1b</i>       | 14                                                                        |
| <i>Nb-epss</i>                  | <i>N. benthamiana eds1a pad4 sag101a sag101b</i>           | (Lapin et al., 2019)                                                      |
| <i>N. benthamiana</i> wild type | <i>N. benthamiana</i> (MPIPZ stock)                        | (Lapin et al., 2019)                                                      |

### Supplementary Table 3. Agrobacteria strains used in this study

| Strain name | Full name                                    | Strain                       |
|-------------|----------------------------------------------|------------------------------|
| dDL276      | p35S:NRG1.1-StrepII-3xHA                     | GV3101 pMP90RK <sup>10</sup> |
| dXS323      | p35S:NRG1.1 <sup>E14A/E27A</sup> -3xHA       | GV3101 pMP90RK               |
| dXS318      | p35S:NRG1.1 <sup>L21A/K22A</sup> -3xHA       | GV3101 pMP90RK               |
| dXS320      | p35S:NRG1.1 <sup>G199AK200AT201A</sup> -3xHA | GV3101 pMP90RK               |
| dJDQ367     | p35S:EDS1-3xFLAG                             | GV3101 pMP90RK               |
| dXS334      | p35S:EDS1 <sup>H476Y</sup> -3xFLAG           | GV3101 pMP90RK               |
| dXS338      | p35S:EDS1 <sup>F419E</sup> -3xFLAG           | GV3101 pMP90RK               |
| MW30        | pEDS1:EDS1-YFP                               | GV3101 pMP90RK               |
| dXS298      | p35S:SAG101-3xFLAG                           | GV3101 pMP90RK               |
| dDL336      | pADR1-L2:ADR1 L2- StrepII-3xHA               | GV3101 pMP90RK <sup>10</sup> |
| dXS264      | p35S:3xFLAG-GUS                              | GV3101 pMP90RK               |
| CLR071      | p35S:PAD4-3xFLAG                             | GV3101 pMP90RK               |

### References for Supplementary materials

1. Rappsilber J, Ishihama Y, Mann M. Stop and go extraction tips for matrix-assisted laser desorption/ionization, nanoelectrospray, and LC/MS sample pretreatment in proteomics. *Analytical chemistry* **75**, 663-670 (2003).
2. Cox J, Mann M. MaxQuant enables high peptide identification rates, individualized p.p.b.-range mass accuracies and proteome-wide protein quantification. *Nature biotechnology* **26**, 1367-1372 (2008).
3. Tyanova S, Temu T, Cox J. The MaxQuant computational platform for mass spectrometry-based shotgun proteomics. *Nature protocols* **11**, 2301-2319 (2016).
4. Bender KW, *et al.* Autophosphorylation-based Calcium (Ca<sup>2+</sup>) Sensitivity Priming and Ca<sup>2+</sup>/Calmodulin Inhibition of Arabidopsis thaliana Ca<sup>2+</sup>-dependent Protein Kinase 28 (CPK28). *The Journal of biological chemistry* **292**, 3988-4002 (2017).
5. Bartsch M, *et al.* Salicylic acid-independent ENHANCED DISEASE SUSCEPTIBILITY1 signaling in Arabidopsis immunity and cell death is regulated by the monooxygenase FMO1 and the Nudix hydrolase NUDT7. *The Plant cell* **18**, 1038-1051 (2006).
6. Cui H, Gobbato E, Kracher B, Qiu J, Bautor J, Parker JE. A core function of EDS1 with PAD4 is to protect the salicylic acid defense sector in Arabidopsis immunity. *The New phytologist* **213**, 1802-1817 (2017).
7. Jirage D, *et al.* Arabidopsis thaliana PAD4 encodes a lipase-like gene that is important for salicylic acid signaling. *Proceedings of the National Academy of Sciences of the United States of America* **96**, 13583-13588 (1999).
8. Wagner S, *et al.* Structural basis for signaling by exclusive EDS1 heteromeric complexes with SAG101 or PAD4 in plant innate immunity. *Cell host & microbe* **14**, 619-630 (2013).

9. Wildermuth MC, Dewdney J, Wu G, Ausubel FM. Isochorismate synthase is required to synthesize salicylic acid for plant defence. *Nature* **414**, 562-565 (2001).
10. Lapin D, *et al.* A Coevolved EDS1-SAG101-NRG1 Module Mediates Cell Death Signaling by TIR-Domain Immune Receptors. *The Plant cell* **31**, 2430-2455 (2019).
11. Bonardi V, Tang S, Stallmann A, Roberts M, Cherkis K, Dangl JL. Expanded functions for a family of plant intracellular immune receptors beyond specific recognition of pathogen effectors. *Proceedings of the National Academy of Sciences of the United States of America* **108**, 16463-16468 (2011).
12. Coll NS, Smidler A, Puigvert M, Popa C, Valls M, Dangl JL. The plant metacaspase AtMC1 in pathogen-triggered programmed cell death and aging: functional linkage with autophagy. *Cell Death & Differentiation* **21**, 1399-1408 (2014).
13. Zhou Y, Hartwig B, James GV, Schneeberger K, Turck F. Complementary Activities of TELOMERE REPEAT BINDING Proteins and Polycomb Group Complexes in Transcriptional Regulation of Target Genes. *The Plant cell* **28**, 87-101 (2016).
14. Castel B, *et al.* Diverse NLR immune receptors activate defence via the RPW8-NLR NRG1. *The New phytologist* **222**, 966-980 (2019).
